# Supplementary material for: SS18 Together with Animal-Specific Factors Defines Human BAF-Type SWI/SNF Complexes
Source: PLoS One. 2012 Mar 19;7(3):e33834. doi: 10.1371/journal.pone.0033834 (PMC3307773; doi:10.1371/journal.pone.0033834)
Supplement: Data S2 — Quadruplate polyA mRNA expression profile of Hek293 cells determined with the Affymetrix human exon array 1.0 ST platform. (XLS) [file pone.0033834.s002.xls]

## Sheet: Affydata
Systematic	Normalized	Normalized	Normalized	Normalized	Common	GeneSymbol	SWI_subunits	Table_1	Average
3820921	6.19315	4.47383	7.00271	6.05366	BRG1; SNF2; SWI2; BAF190; SNF2L4; SNF2LB; hSNF2b; FLJ39786; SNF2-BETA	SMARCA4	BRG1	1	5.93084
3159946	1.44805	1.34538	1.56376	1.44117	BRM; SNF2; SWI2; hBRM; Sth1p; BAF190; SNF2L2; SNF2LA; hSNF2a; FLJ36757; MGC74511	SMARCA2	Brm	2	1.44959
2326640	1.90334	1.40282	1.52603	1.67026	B120; P270; BM029; BAF250; C1orf4; BAF250a; SMARCF1	ARID1A	Baf250a	3	1.62562
2932928	2.08517	1.73638	2.19604	2.14477	6A3-5; DAN15; p250R; BRIGHT; BAF250b; ELD/OSA1; KIAA1235; RP11-419L10.1	ARID1B	BAF250b	4	2.04059
	nd	nd	nd	nd			ARID2	5
2676219	4.59598	4.43921	4.04173	4.34335	PB1; BAF180; MGC156155; MGC156156		Polybromo	6	4.35507
3457455	9.7376	7.31619	10.6086	9.34847	Rsc8; BAF170; CRACC2	SMARCC2	SMARCC2	7	9.25272
2672857	6.92935	6.55138	7.27819	6.99887	Rsc8; SRG3; SWI3; BAF155; CRACC1	SMARCC1	SMARCC1	8	6.93945
3414390	4.62237	3.4443	4.33338	3.65597	Rsc6p; BAF60A; CRACD1	SMARCD1	SMARCD1	9	4.01401
3766415	8.90492	6.27587	8.97446	6.62323	Rsc6p; BAF60B; CRACD2; PRO2451	SMARCD2	SMARCD2	10	7.69462
3079576	2.76211	2.3734	3.66827	3.2665	Rsc6p; BAF60C; CRACD3; MGC111010	SMARCD3	SMARCD3	11	3.01757
3756344	8.96374	12.266	9.27021	9.4	BAF57	SMARCE1	SMARCE1	12	9.97498
2654023	6.76981	8.61908	8.00334	10.1052	ACTL6; BAF53A; MGC5382	ACTL6A	BAF53A	13	8.37436
3064204	1.19177	1.842	1.58353	2.08446	ACTL6; BAF53B	ACTL6B	ACTL6B	14	1.67544
3939365	5.76142	4.29966	7.5065	5.67688	RDT; INI1; SNF5; Snr1; BAF47; Sfh1p; hSNFS; SNF5L1	SMARCB1	SMARCB1	15	5.81111
2986084	2.71009	4.00202	2.24696	3.34311	XAP135; FLJ10975; MGC111009	PHF10	PHF10	16	3.07555
3861243	0.498897	0.332121	0.635689	0.539296	NEUD4; neuro-d4; MGC150428; MGC150429	DPF1	DPF1	17	0.501501
3571059	0.411664	0.218902	0.189691	0.213052	CERD4; FLJ14079	DPF3	DPF3	18	0.258327
3335089	2.57127	1.93099	3.64933	3.05713	REQ; UBID4; ubi-d4; MGC10180	DPF2	DPF2	19	2.80218
3802129	3.94214	3.51461			SYT; SSXT; MGC116875	SS18	SS18	20	3.72838
3980887	7.01455	12.6109	8.84395	11.2009			SS18l1	21	9.91756
	nd	nd	nd	nd			BCL7A	22
3056108	5.17167	4.11226	5.41159	4.38691	BCL7B	BCL7B	BCL7B	23	4.77061
3688038	3.37423	3.46211	4.89819	4.99886	BCL7C	BCL7C	BCL7C	24	4.18335
	nd	nd	nd	nd			BRD7	25
2845474	0.253239	0.279171	0.11017	0.0722355	BRD9	ZDHHC11B	BRD9	26	0.178704
	nd	nd	nd	nd			SSX1	27
3837372	1.46345	1.04761	1.2468	1.04031	GLTSCR1	GLTSCR1	GLTSCR1	28	1.19954
3645253	9.23681	6.63826	8.6899	8.04575	300-KD; SRL300; SRm300; FLJ21926; FLJ22250; KIAA0324; MGC40295; DKFZp686O15166	SRRM2	SRRM2	29	8.15268
3742130	5.06242	3.50904	3.60312	2.71349	P160; PAP2; FLJ37886	MYBBP1A	MYBBP1A	30	3.72202
	nd	nd	nd	nd			NONO	31
3380901	3.64317	2.47309	3.60487	3.20991	NUMA	NUMA1	NUMA1	32	3.23276
2406064	11.6993	11.822	10.7187	11.4284	PSF; POMP100	SFPQ	SFPQ	33	11.4171
3974838	12.8265	11.3615	13.23	11.3052	DBX; DDX3; HLP2; DDX14	DDX3X	DDX3X	34	12.1808
3960629	12.6867	10.4005	12.291	12.0058	P72; RH70; DKFZp761H2016	DDX17	DDX17	35	11.846
3336378	7.93736	5.30993	8.61564	6.54952	SIP; COAA; SYTIP1; DKFZp779J0927	RBM14	RBM14	36	7.10311
3766893	17.5716	21.6838	14.5478	15.6841	p68; HLR1; G17P1; HUMP68; DKFZp686J01190	DDX5	DDX5	37	17.3718
3773932	27.5794	32.7178	29.8831	31.3008	ACT; ACTG; DFNA20; DFNA26	ACTG1	actin	39	30.3703
2315554	1.11044	1.46247	1.60924	1.27304	TTLL5; FLJ36119; FLJ42131; RP5-902P8.1	TTLL10
2315633	1.97059	3.29445	1.55054	2.42472	beta3GalT6	B3GALT6
2315674	0.728956	0.818812	0.756709	0.885393	ENaCd; SCNED; dNaCh; ENaCdelta; MGC149710; MGC149711	SCNN1D
2315739	2.4523	3.04817	2.66187	3.2572	FLJ90811	PUSL1
2315894	0.889725	1.42794	1.34942	1.22933	LOC643965
2315918	0.183106	0.143634	0.225617	0.279395	FLJ34599; FLJ37183	ATAD3C
2315951	1.46447	1.22425	1.83741	1.4561
2316218	0.184484	0.333252	0.233836	0.439163	CAGLP	CALML6
2316245	2.17854	1.87773	1.87378	1.84925	PKC2	PRKCZ
2316379	2.834	1.77608	2.35431	2.48875	SKV	SKI
2316558	6.01984	4.94909	4.25981	4.48835	RP4-740C4.2	RER1
2316605	1.29193	1.27453	1.9041	1.46841
2316746	1.44514	1.12924	1.72438	1.4667	MGC26818; DKFZp547M123; RP3-395M20.10	C1orf93
2316905	0.25095	0.367911	0.31881	0.329894	ARPM2; ARPT2; Arp-T2; HARPM2; FLJ25424	ACTRT2
2316953	0.654592	1.01572	0.951387	0.949403	MEL1; PFM13; KIAA1675	PRDM16
2317246	0.878586	0.801474	0.805913	1.00111	NBR; GEF16	ARHGEF16
2317317	2.98395	2.22686	1.9949	1.85012	P73	TP73
2317434	3.53445	3.00097	2.64798	2.68226	FLJ21811; RP11-46F15.3	FAM79A
2317472	1.12607	1.49392	1.39111	1.1819	FLJ32825; MGC138313; MGC138317; RP1-286D6.1	CCDC27
2317512	0.766087	0.518016	0.719005	0.540487	CAD; CPAN; DFF2; DFF40; DFF-40	DFFB
2317686	0.341211	0.246619	0.272162	0.352037	MOT8; SHREW1; SHREW-1; RP3-426F10.1	AJAP1
2318086	0.898656	0.642797	0.730601	0.75115	AKR6A5; KCNA2B; HKvbeta2; KV-BETA-2; MGC117289; HKvbeta2.1; HKvbeta2.2	KCNAB2
2318157	0.903208	1.01594	1.21114	1.00996	C1orf188; FLJ32096; FLJ46380	RNF207
2318170	0.281089	0.13044	0.150423	0.203921	C1orf188; FLJ32096; FLJ46380	RNF207
2318212	0.499817	0.296607	0.363556	0.294177
2318242	0.164825	0.302971	0.335568	0.310368
2318257	0.232768	0.320733	0.502959	0.311511	DFNB36; LP2654; DKFZP434A196; DKFZp434G2126	ESPN
2318338	0.409174	0.469153	0.50005	0.546108	TR1; T1R1; GPR70; gm148	TAS1R1
2318364	0.476221	0.416817	0.379796	0.356555	HKR3; pp9964	ZBTB48
2318398	1.2637	1.04677	0.99376	1.12347	PHF5; SPOC1; MGC43399	PHF13
2318416	0.265051	0.237217	0.239814	0.154608	MGC33488	THAP3
2318455	0.566696	0.454739	0.371954	0.399813	CEB	VAMP3
2318637	9.78215	10.4854	12.4753	13.027	GIG13	PER3
2318656	0.477323	0.413162	0.418251	0.490828	CEB	VAMP3
2318736	10.0275	14.117	11.0615	13.8246	DJ1; DJ-1; FLJ27376	PARK7
2318743
2318744
2318746
2318747
2318751
2318754
2318755
2318759
2318761
2318763
2318765
2318767
2318769
2318771
2318773
2318775
2318777
2318779
2318781
2318783
2318785
2318787
2318789
2318791
2318793
2318795
2318797
2318799
2318801
2318803
2318805
2318807
2318809
2318811
2318813
2318815
2318817
2318819
2318821
2318823
2318825
2318827
2318829
2318831
2318833
2318835
2318837
2318839
2318841
2318843
2318845
2318847
2318849
2318851
2318853
2318855
2318857
2318859
2318861
2318863
2318865
2318867
2318869
2319135	0.167265	0.317899	0.481936	0.44702
2319225	0.358721	0.223546	0.414942	0.43673	GDH; G6PDH; MGC87643; DKFZp686A01246	H6PD
2319252	0.84561	0.743903	0.524462	0.580257	SSB1; SSB-1	SPSB1
2319340	2.48546	5.43316	1.98677	3.26536
2319423	0.228007	0.196471	0.375951	0.322958	p110D	PIK3CD
2319518	1.28063	1.85321	1.4724	1.54016	NMNAT; PNAT1; PNAT-1	NMNAT1
2319550	1.82311	2.81724	1.02687	1.35155	CRBP4; CRBPIV; MGC70641	RBP7
2319560	4.55319	3.97291	4.44026	3.81365	E4; UFD2; HDNB1; UBOX3; KIAA0684	UBE4B
2319661	1.61894	1.34069	1.14914	1.07327	KLP; CMT2; CMT2A; CMT2A1; HMSNII; FLJ23699; KIAA0591; KIAA1448; MGC134844	KIF1B
2319802	18.2124	17.3006	15.2626	14.8899	6PGD	PGD
2319832	1.9455	3.31312	1.60171	2.6468	CENPS; CENP-S; MGC32686	APITD1
2319881	1.24916	0.893504	1.18681	1.27046	NAPP2; Pex14p; MGC12767; dJ734G22.2	PEX14
2320048	2.66007	5.158	2.95904	3.64368	LOC653768
2320051
2320052
2320058
2320059
2320060
2320062
2320063
2320064
2320065
2320066
2320067
2320068
2320069
2320070
2320071
2320075
2320077
2320078
2320088
2320090
2320092
2320094
2320096
2320098
2320100
2320102
2320104
2320106
2320108
2320110
2320112
2320114
2320116
2320118
2320120
2320122
2320124
2320126
2320128
2320130
2320132
2320134
2320136
2320138
2320140
2320142
2320144
2320146
2320148
2320150
2320188	0.19244	0.212778	0.323131	0.205272	AngX; CDT6; dJ647M16.1; RP4-647M16.2	ANGPTL7
2320210	2.26939	2.01441	2.69005	2.34171	TERE1; RP4-796F18.1	UBIAD1
2320347	1.22907	0.846333	1.20442	1.00967	FBG3; FBX30; Fbx44; Fbxo6a; MGC14140; DKFZp781J0852	FBXO44
2320374	0.949669	0.941116	1.16872	1.08916	FBG2; FBS2; FBX6; Fbx6b	FBXO6
2320392	0.614097	0.903552	0.509619	0.593547	UNQ3119; AGPA3119; FLJ34999; MGC117222	C1orf187
2320411	4.49067	4.32707	4.23782	3.4995	ATRAP; MGC29646	AGTRAP
2320472	0.951541	0.781928	0.549211	0.649084	CLC-6; KIAA0046	CLCN6
2320581	4.25883	2.86345	3.73961	3.07294	LH; LLH; PLOD	PLOD1
2320619	4.49713	3.21446	3.77034	3.0001	HSG; MARF; CMT2A; CPRP1; CMT2A2; KIAA0214	MFN2
2320657	1.66144	1.26478	1.34918	1.28323	CD30; KI-1; D1S166E	TNFRSF8
2320683	0.81984	0.85595	1.39197	1.01966	CD30; KI-1; D1S166E	TNFRSF8
2320727	1.36817	2.07009	1.96873	2.44665	p75; TBPII; TNFBR; TNFR2; CD120b; TNFR80; TNF-R75; p75TNFR; TNF-R-II	TNFRSF1B
2320762	1.79328	1.54811	1.32014	1.46342	FLJ23066	VPS13D
2321011	0.134386	0.225205	0.185439	0.259347	PRAMEF12	PRAMEF12
2321040	0.0348093	0.0456921	0.0167854	0.0524603	dJ1198H6.1; RP5-845O24.1	PRAMEF1
2321058	0.152803	0.274994	0.210272	0.0848739	FLJ43580; DJ845O24.3; RP5-845O24.1	PRAMEF2
2321182	5.34319	4.54227	6.55354	4.92212	T1A; GP36; GP40; Gp38; OTS8; T1A-2; HT1A-1; PA2.26	PDPN
2321238	1.50108	1.44363	1.19904	1.31161	RIZ; RIZ1; RIZ2; MTB-ZF; HUMHOXY1	PRDM2
2321466	0.718082	0.727679	0.732742	0.667632	KIAA1026; RP1-21O18.1
2321607	0.355946	0.260044	0.351738	0.467464	KIAA1026; RP1-21O18.1
2321645	0.698595	1.01109	0.557738	0.807031	C1orf72; FLJ10199	TMEM51
2321779	1.0311	1.09495	1.32114	1.45534
2321797	0.385728	0.747178	0.740429	0.660095	CLCR; ELA4	CTRC
2321813	0.376753	0.554165	0.734308	0.720833	ELA2A; ELA1; PE-1
2321828	0.253307	0.406275	0.392881	0.437862	ELA2B; MGC97052; MGC142100; MGC142102; RP11-265F14.2
2321849	2.94571	2.1563	2.54003	2.31123	KIAA0962; RP4-680D5.1; DKFZp686G1298; DKFZp686N0387; DKFZp781I1547	DNAJC16
2321911	2.05125	1.61145	1.32784	1.29574	MGC14844; RP4-680D5.5	DDI2
2321942	1.75734	1.72589	1.35263	1.37933	MGC14844; RP4-680D5.5	DDI2
2321960	2.276	1.56953	1.77298	1.76826	SKIP; KIAA0842; RP11-169K16.1	PLEKHM2
2322004	1.67953	1.45003	1.63818	1.69298	RP11-169K16.2; DKFZp781A10161	SLC25A34
2322036	1.87707	1.60805	1.60703	1.4118	CAL; FBLP1; FBLP-1; DKFZp434G171; RP11-169K16.5	FBLIM1
2322103	10.7058	8.16803	5.00527	5.17112	MINT; SHARP; KIAA0929; RP1-134O19.1	SPEN
2322211	0.252513	0.293766	0.300135	0.3612	MGC24047; RP11-5P18.4	C1orf64
2322226	1.15925	1.72821	1.74537	1.39731	CLCK1; ClC-K1; hClC-Ka; MGC61490	CLCNKA
2322264	0.687822	0.87859	1.17164	1.14555	CLCKB; ClC-K2; hClC-Kb; MGC24087	CLCNKB
2322362	6.20803	5.67976	5.95028	5.69544	MGC70432; DKFZp566C0424	C1orf144
2322389	6.67826	5.12024	6.55059	6.01071	FLJ10420; RP4-798A10.1	NECAP2
2322598	1.21906	1.0646	0.722556	1.00763
2322786	1.08478	1.34815	1.04684	1.42859	PDI; PAD1; PDI1; HPAD10	PADI1
2322818	0.418962	0.306883	0.663064	0.40458	PAD3; PDI3; MGC126307; MGC126308	PADI3
2322848	0.641601	0.675802	1.15244	0.722773	PAD; PDI4; PDI5; PADI5	PADI4
2322894	0.421891	0.696726	0.905394	0.880126	PADI6	PADI6
2322957	0.466523	0.518196	0.98656	0.556065	FLJ10521; KIAA1626; GrinchGEF; RP11-473A10.1	ARHGEF10L
2323087	0.234931	0.337359	0.272533	0.177739
2323172	0.804549	0.753682	0.720572	0.465864	FLJ41177; MGC15730; RP11-121A23.1	IGSF21
2323285	0.356248	0.383956	0.305167	0.405176	FLJ38753; RP11-422P22.2	KLHDC7A
2323347	0.445258	0.468578	0.693181	0.55503	HUP1; PAX7B	PAX7
2323559	6.54744	7.95887	6.41762	6.7594	MRT4; C1orf33; dJ657E11.4	MRTO4
2323603	1.60668	1.25692	1.86108	1.39641	FLJ20320; FLJ23906; FLJ26661; FLJ26665; RP4-657E11.5	PQLC2
2323743	0.205195	0.23886	0.14061	0.204899	MGC87895
2323774	1.2885	1.18787	1.29765	1.33396	FLJ36999; RP5-1056L3.2	C1orf151
2323790	2.06476	1.95884	2.72427	2.64586	5-HT6	HTR6
2323847	0.127723	0.188673	0.288793	0.269705	GV-PLA2; PLA2-10; MGC46205; hVPLA(2); DKFZp686C2294	PLA2G5
2323882	0.354212	0.29234	0.420001	0.408316	FLJ25429; FLJ36326	PLA2G2F
2323899	0.289474	0.362356	0.399781	0.392078	FLJ25429	UBXD3
2323951	0.47183	0.381749	0.266305	0.294628	FLJ32784; FLJ43845
2324061	0.947874	0.965636	1.46839	0.914397	FLJ44952	FAM43B
2324084	0.509548	0.375216	0.446982	0.384938	CDD	CDA
2324097	1.84112	3.3053	1.60371	2.54918	BRPK; PARK6; FLJ27236	PINK1
2324341	1.1442	0.871041	1.15904	0.831993	AB14; MGC8902	NBPF15
2324416	0.413654	0.23172	0.255252	0.335761	HOPS; TNAP; TNSALP; AP-TNAP; FLJ40094; MGC161443	ALPL
2324571	1.69849	1.61578	2.06959	1.86797	ELA3A	ELA3B
2324594	0.756563	0.585061	0.546113	0.57196	ELA3	ELA3A
2324616	1.93545	2.67893	1.44257	1.76461	HSPC157
2324634	1.92317	4.0667	1.54963	2.06631	LOC643751
2324743	1.32339	1.14802	0.987944	1.04227	KIAA0478; MGC133098	ZBTB40
2324820	0.492383	0.713354	1.0315	0.791838	EEK; HEK3; KIAA1459	EPHA8
2324856	0.283414	0.407963	0.373813	0.418555	C1QA	C1QA
2324873	0.188005	0.432984	0.384409	0.460728	C1QG; C1q-C; FLJ27103	C1QC
2324884	0.487427	0.489859	0.24743	0.308763	C1QB	C1QB
2324919	1.32763	0.954236	0.73936	0.748369	DRT; ERK; CAPB; Hek5; PCBC; EPHT3; Tyro5; MGC87492	EPHB2
2325002	10.6859	10.3039	12.0374	10.3489	LSD1; BHC110; KIAA0601	AOF2
2325113	0.451051	0.372942	0.560609	0.433344	FLJ90508	C1orf213
2325158	0.392178	0.565807	0.504832	0.498601	RP11-223J15.1	MDS2
2325192	24.0059	28.3119	23.2703	23.9711	GIG34	RPL11
2325197
2325198
2325200
2325201
2325203
2325205
2325206
2325210
2325212
2325214
2325216
2325218
2325220
2325222
2325224
2325251	3.90201	3.58604	2.86758	2.89544	SIII; TCEB3A	TCEB3
2325274	2.35058	3.10638	2.43936	2.78949	HT014; TXNL1CL; RP5-886K2.4	C1orf128
2325290	1.94581	2.32455	2.58278	2.19052	APT; LYPLA2L; dJ570F3.6	LYPLA2P1
2325358	0.268221	0.332841	0.534986	0.393599	SOM; TFCP2L4; MGC46624	GRHL3
2325410	5.27732	3.73791	4.18832	3.96556	DJ462O23.2; RP3-462O23.3; DKFZp686E22155	NPAL3
2325479	1.60738	1.44679	1.53172	1.43294	RCN3; MCIP3; hRCN3	DSCR1L2
2325526	2.57494	2.17602	2.21199	1.97885	160-KD; POP101; SRM160; MGC39488	SRRM1
2325593	7.43803	11.1945	8.85883	8.75127	H1; huH1; p64H1; CLIC4L; FLJ38640; DKFZP566G223	CLIC4
2325877	0.01	0.0113901	0.01	0.0105089	RH; RHC; RHE; Rh4; RHPI; RhVI; RH30A; RHIXB; RhVIII; CD240CE; RhIVb(J); MGC103977	RHCE
2326018	0.661685	0.488435	0.725691	0.569167	ARH; ARH1; ARH2; FHCB1; FHCB2; MGC34705; DKFZp586D0624	LDLRAP1
2326049	0.850587	0.481384	0.567614	0.684474	HMIC; MAN1C; MAN1A3; pp6318	MAN1C1
2326126	4.25626	4.9913	6.21458	5.08446	RSS; SELN; MDRS1; RSMD1; FLJ24021	SEPN1
2326157	3.03931	3.61101	2.25526	2.379	MST116; MSTP116; HYST1888	FAM54B
2326237	0.689545	0.697753	1.14553	0.880492	EXTL; MGC70794	EXTL1
2326286	3.0259	2.47426	3.22795	3.29073	CLIK1L; RP11-96L14.4	PDIK1L
2326295	0.587092	0.638183	0.809568	0.975605	FLJ14050; RP11-96L14.5	GRRP1
2326311	1.64179	2.58718	1.50004	1.87829	ZT86	ZNF593
2326327	0.86706	0.818145	1.03169	0.705571	CNK; KSR; CNK1	CNKSR1
2326410	2.52391	2.15193	1.88829	1.67573	MGC149223	CATSPER4
2326448	1.95364	1.87424	2.22564	2.18782	TIP-B1; SH3BP-1	SH3BGRL3
2326463	0.261703	0.362544	0.275226	0.261353	CDW52	CD52
2326485	0.330109	0.43836	0.563272	0.564188	CSDD1; LIN-28; LIN28A; ZCCHC1; FLJ12457	LIN28
2326496	1.9964	1.68377	2.19852	2.04494	DS; CIT; CPT; HDS; FLJ13102	DHDDS
2326531	0.215549	0.226732	0.288882	0.432119
2326561	0.869131	0.781938	0.816792	0.506563	RSK; HU-1; RSK1; MAPKAPK1A; S6K-alpha 1	RPS6KA1
2326707	1.7193	1.64367	1.25464	1.30142	FLJ20477; RP1-50O24.2	PIGV
2326749	3.03712	2.1281	2.51742	2.49987	DKFZp667O2416	ZDHHC18
2326774	0.799687	0.845531	1.18504	0.782989	YWHAS	SFN
2326799	0.671699	1.04225	0.777307	0.915459	HNUDC; MNUDC; NPD011	NUDC
2326846	1.30559	0.99532	1.69087	1.29545	LOC388610
2326912	2.81505	2.14907	2.50553	2.17689	KIAA1037; RP11-4K3__A.1	WDTC1
2326954	1.86432	1.7378	2.16498	1.95262	LOC644961
2326993	0.883573	0.482748	0.580535	0.474893	JFC1; SLP1; FLJ14996	SYTL1
2327045	1.73681	2.13228	1.78971	1.80812	ACCA	GPR3
2327188	0.753991	0.568486	0.583876	0.601099	LOC654163
2327219	4.7492	4.42229	3.93278	3.70343	STX13; STX14; MGC51957	STX12
2327259	8.34525	6.70139	8.07251	6.63412	STX13; STX14; MGC51957	STX12
2327283	0.427816	0.294649	0.36892	0.285889	ICB-1	C1orf38
2327310	1.03411	0.683393	0.684513	0.767272	ASML3B	SMPDL3B
2327338	1.64657	1.38621	1.7848	1.34458	XRG8; FLJ10307; RP11-460I13.3	XKR8
2327375	12.7254	17.8544	12.0701	15.613	IP; ATPI; ATPIP; MGC1167; MGC8898	ATPIF1
2327391	2.15624	1.42403	2.36314	1.69623	HI95; SES2; SEST2; DKFZp761M0212; DKFZp761M02121	SESN2
2327418	0.898624	1.24991	0.468367	0.638415	p28b; FLJ20045	MED18
2327482	6.11265	5.0622	4.79591	4.31379	MGC45806; RP4-669K10.6	RAB42
2327542	4.53938	5.90696	4.15831	4.87919	SECP43; PRO1902; FLJ20503; RP4-669K10.4	TRSPAP1
2327572	0.0876627	0.0478929	0.119119	0.10842	LOC646996
2327603	1.93299	1.77157	1.62768	1.66198	PIF96; P96PIF	GMEB1
2327630	3.16196	2.72205	3.29846	2.87561	HGRG8; NY-REN-2	YTHDF2
2327659	0.662821	0.587141	0.765933	0.800963	OPRD	OPRD1
2327677	4.21682	4.2191	3.9279	3.52808	HE; EL1; 4.1R	EPB41
2327817	1.27497	0.993557	1.2279	1.31355	FMI; PTP; PCP-2; PTP-J; PTPRO; PTPU2; GLEPP1; PTP-PI; PTPPSI; hPTP-J; FLJ37530; R-PTP-PSI	PTPRU
2328236	2.93606	3.34394	2.38839	3.29703	PS1D; pNO40; HSPC251; RP11-266K22.1	ZCCHC17
2328273	1.34289	0.921172	1.38862	1.11874	TDE2; TDE2L; FKSG84; PRO0899; MGC90340	SERINC2
2328320	1.7634	2.0498	2.45015	2.05515	OX1R	HCRTR1
2328387	0.401895	0.42107	0.398626	0.491082	OX1R	HCRTR1
2328465	5.73369	5.40855	7.75932	6.79472	MGC125940; MGC125941	INMT
2328475
2328476
2328477
2328484
2328486
2328487
2328488
2328489
2328492
2328494
2328496
2328499
2328500
2328501
2328502
2328503
2328504
2328511
2328513
2328515
2328517
2328519
2328521
2328523
2328525
2328527
2328529
2328531
2328533
2328535
2328537
2328539
2328541
2328543
2328545
2328547
2328549
2328551
2328553
2328555
2328557
2328559
2328561
2328563
2328565
2328567
2328569
2328571
2328573
2328575
2328577
2328579
2328581
2328583
2328585
2328587
2328589
2328591
2328593
2328595
2328597
2328599
2328601
2328603
2328605
2328607
2328609
2328611
2328613
2328615
2328617
2328619
2328621
2328623
2328633	1.40997	1.03591	1.07167	1.07873	FLJ10315; RP11-277A4.3	TMEM39B
2328674	4.4779	4.09041	3.97297	3.77889	IPOA7; KPNA7; FLJ11249; MGC17918	KPNA6
2328713	7.06632	6.13899	6.27764	5.69205	TRIP1; eIF3i; TRIP-1; PRO2242; eIF3-p36; eIF3-beta	EIF3S2
2328750	3.10437	4.33157	3.54403	4.22026	DCDC2B	DCDC2B
2328767	0.661969	1.04937	0.660063	0.740579	MGC1203; MGC16441; RP4-622L5.5	CCDC28B
2328808	19.877	27.2304	19.3721	21.76	DCDC2B	DCDC2B
2328837	0.232294	0.316187	0.364204	0.288827	MGC10820	C1orf90
2328841	1.04474	1.68703	1.71235	1.604	YT16; p56lck; pp58lck	LCK
2328868	12.5959	12.4679	10.4274	10.8	HD1; RPD3; GON-10; RPD3L1; DKFZp686H12203	HDAC1
2328909	0.200823	0.251244	0.310584	0.313732	SPOGA3; STK22C; STK22D	TSSK3
2328936	0.910612	1.14256	0.765575	0.806675	ZBTB8
2328990	0.485856	0.925842	0.350013	0.66221	LOC642954
2329041	0.963021	0.558144	0.92428	0.756254	KIAA1522	KIAA1522
2329077	2.8805	2.22648	3.08109	2.86898	FLJ12903; S100PBPR; DKFZp313K2325	S100PBP
2329131	0.451595	0.527541	0.555571	0.500964	BDR2	HPCA
2329196	0.802227	0.803205	1.36991	1.34558	ODC-p; ODC1L; KIAA1945	ADC
2329266	1.40738	1.21947	1.78486	1.65352	FLJ25476; MGC138318; RP11-415J8.1
2329341	0.467294	0.540462	0.668661	0.62066	KOX29; ZFP-31; ZNF360; ZSCAN20	ZNF31
2329386	0.262169	0.228121	0.281168	0.203248	FLJ40388; MGC88128; dJ1007G16.5	HMGB4
2329481	0.320594	0.364936	0.32393	0.397973	MGC15882	C1orf94
2329669	3.63177	3.5817	3.14269	3.17296	MYM; FLJ23151; FLJ43753; RP11-181E22.4	ZMYM1
2329752	5.12097	4.47558	3.8739	4.43806	MYM; CDIR; ZNF262; KIAA0425; ZNF198L3; DKFZp686L0547; DKFZp686B09210	ZMYM4
2329887	2.19372	1.82057	1.99843	1.92698
2329920	2.08087	2.20778	2.64933	1.96382	AP2E; MGC49007	TFAP2E
2330002	1.13173	1.02176	0.869967	0.977745	AGO4	EIF2C4
2330075	4.10852	3.25335	3.50367	3.11246	Q99; AGO1; EIF2C; GERP95; DKFZp686M13167	EIF2C1
2330133	2.95011	2.28979	2.44593	2.20383	AGO3; FLJ12765; MGC86946	EIF2C3
2330234	0.355068	0.349647	0.637113	0.456264	TEKTB1; h-tektin-t	TEKT2
2330253	2.38642	2.49595	2.51676	2.61555	ARH3; FLJ20446; dJ665N4.2	ADPRHL2
2330289	1.83327	1.25417	1.75211	1.63012	RPRC1; PARCC1; FLJ10350; FLJ39022; MGC117315	MAP7D1
2330334	6.6883	5.76981	6.34385	6.51677	FLJ22938	C1orf113
2330393	0.521668	0.330676	0.290412	0.285358	FLJ22938	C1orf113
2330687	0.554346	0.430623	0.41356	0.526918	MCPIP; FLJ23231; dJ423B22.1; RP3-423B22.1	ZC3H12A
2330723	0.350944	0.364533	0.219494	0.341233	P28; hp28; dJ423B22.5	DNALI1
2330773	1.92359	1.77258	1.70091	1.60771	BOR; FLJ10468; FLJ12042	CDCA8
2330843	1.73921	1.04285	1.73433	1.17932	FLJ31434; MGC78681; RP11-109P14.3	MANEAL
2330899	6.33205	8.66591	5.17413	6.787	CGI94; CGI-94	UTP11L
2331158	4.14792	4.04311	5.2193	4.22364	STRF2; FLJ12666; RP11-781D11.2	C1orf108
2331178	14.5563	15.6397	13.9315	16.5457	NDUFS5	NDUFS5
2331213	3.04062	2.69006	1.91216	2.15671	ACF7; MACF; OFC4; ABP620; FLJ45612; FLJ46776; KIAA0465; KIAA1251	MACF1
2331505	0.223558	0.251649	0.128986	0.148286	ACF7; MACF; OFC4; ABP620; FLJ45612; FLJ46776; KIAA0465; KIAA1251	MACF1
2331511	0.188875	0.321523	0.225776	0.343541	LOC651882
2331558	0.312813	0.34838	0.510593	0.41129	FLJ14351; FLJ45264	BMP8A
2331602	5.96404	7.73506	5.79292	7.36459	CYP-33; MGC3736; MGC111222	PPIE
2331679	0.782337	0.537305	0.476795	0.450572	FP1147; PP10484; FLJ14490; FLJ35904; HMFN0656; RP3-342P20.1	MFSD2
2331727	11.3851	11.3981	10.7618	10.6184	CAP; CAP1-PEN	CAP1
2331771	2.59079	2.59259	2.09354	2.31804	Zn-15L; ZNF292L; MGC142226	RLF
2331822	11.5713	11.3339	8.78893	8.22797	FACE1; STE24; FACE-1; Ste24p; FLJ14968	ZMPSTE24
2331857	5.56168	4.12821	5.12614	4.68437	RP1-228H13.3	SMAP1L
2331903	0.47772	0.482652	0.451454	0.559528	FLJ34293; RP11-656D10.1	ZNF643
2331937	0.550326	0.451987	0.662427	0.636974	Zfp69; FLJ16030; RP11-656D10.2	ZNF642
2331959	1.32967	1.32809	1.01163	1.21341	FLJ11445; FLJ13183; FLJ21144	C1orf176
2331974	0.55829	0.737607	0.348115	0.338521	MGC27466	ZNF684
2332013	6.35201	5.60707	5.30216	5.23787	HSM; CBFC; HAP5; CBF-C; NF-YC; H1TF2A; hCBF-C; FLJ45775; DKFZp667G242	NFYC
2332091	0.509946	0.594912	0.682692	0.375458	DFNA2; KV7.4	KCNQ4
2332144	6.95651	9.47037	5.84713	7.1921	CTPS	CTPS
2332481	0.170656	0.195855	0.288543	0.214175	UGN; GCAP-II	GUCA2B
2332528	1.45701	1.29629	0.825367	0.776749	MGC47816; RP11-157D18.1	FAM80A
2332566	4.74286	6.33721	5.25922	6.29625	FLJ11838; MGC117357; MGC138220; RP11-163G10.1	PPCS
2332583	0.395978	0.394319	0.273291	0.355538
2332711	12.4073	12.9994	13.0139	12.7181	CYPH; CYP-20; MGC5016; USA-CYP; SnuCyp-20	PPIH
2332767	1.45395	1.30445	1.20194	1.29287	MGC955	C1orf50
2332812	0.864228	0.80534	1.26723	1.05916	RD; SC; PRO2801; MGC118810; MGC118811; MGC118812; MGC118813	ERMAP
2332855	1.825	2.18189	1.34861	2.1733	Zfp691; RP11-342M1.5	ZNF691
2332999	0.60255	0.436404	0.270473	0.203679	FLJ32000; RP11-282K6.2	WDR65
2333035	0.713837	0.692421	0.821279	0.680303	MGC17299	TMEM125
2333051	0.710808	0.366754	0.612191	0.41378	TIE; JTK14	TIE1
2333107	0.921783	0.950057	0.802012	0.544749	MPLV; TPOR; C-MPL; CD110	MPL
2333136	9.49505	7.94168	8.93408	8.25317	CDC20A; p55CDC; MGC102824; bA276H19.3	CDC20
2333168	1.84296	1.39322	1.60952	1.68307	FLJ34502; RP11-506B15.1	C1orf84
2333195	1.69019	1.16345	1.22651	1.36263	FLJ10387; FLJ23425; RP11-506B15.3	KIAA0467
2333318	3.88608	2.71748	3.48415	3.48062	LAR; FLJ43335; FLJ45062; FLJ45567	PTPRF
2333429	1.90392	1.62423	1.47324	1.67825	JMJD2; JHDM3A; KIAA0677	JMJD2A
2333481	0.636175	0.512461	0.747131	0.878656	ST3N; SIAT6; ST3GALII; ST3GalIII; ST3Gal III	ST3GAL3
2333574	6.22224	4.49402	4.21141	3.92275	EVN; NBN	ARTN
2333599	1.94917	1.36798	1.52248	1.42977	IMP13; KAP13; RANBP13; KIAA0724	IPO13
2333635	2.48841	1.81448	2.46879	2.03387	DPH2L2	DPH2
2333658	10.0453	10.0415	10.3165	9.52104	ATP6F; HATPL; VMA16	ATP6V0B
2333663
2333667
2333669
2333670
2333671
2333672
2333673
2333675
2333676
2333677
2333678	5.51293	4.08985	6.25988	4.87549
2333707	0.506794	0.532652	0.593989	0.527261	MGC45441; RP5-1198O20.2	CCDC24
2333777	0.256136	0.472412	0.307002	0.375156	ZNF393; Zfp393; FLJ40160; RP4-675G8.1	KLF17
2333794	5.12089	4.98423	4.41045	4.57651	EAF2; SWC4; DNMAP1; DNMTAP1; FLJ11543; KIAA1425; DKFZp686L09142	DMAP1
2333907	8.95128	6.79788	9.01575	7.22161	FLJ10597; RP4-678E16.1	C1orf164
2334052	0.475222	0.592708	0.839511	0.584838	MGC33556
2334098	2.64584	2.83004	2.02959	2.47216	MCAK; KNSL6	KIF2C
2334191	0.897025	0.862288	1.15608	0.89526	CNK; FNK; PRK	PLK3
2334279	3.05957	3.79967	2.44447	2.83844	PCT	UROD
2334314	0.104286	0.122257	0.235347	0.213816	MGC15668; RP4-534D1.1	GLOXD1
2334319	2.78944	3.05261	2.26553	2.28951	FLJ13949	TOE1
2334350	4.63836	3.17192	3.42041	3.25159	FLJ25671; DKFZp564I122; RP11-291L19.3	MMACHC
2334374	2.15523	2.21176	2.16452	1.84389	ALR; ALDR1; MGC1380; MGC12529	AKR1A1
2334404	12.0702	9.32023	13.327	10.3039	FLB7527; MGC2297; PRO1999; FLJ31599; FLJ35510; MGC19722; MGC20372; DKFZp547F162	NASP
2334459	5.87214	6.55047	5.19572	5.42523	C1orf154; FLJ21029; MGC104183; RP11-767N6.4	TMEM69
2334476	2.01661	1.42914	1.50774	1.31244
2334602	0.168396	0.27135	0.121944	0.168609	NET-1; TSPAN-1; 9030418M05Rik; RP11-322N21.1	TSPAN1
2334629	0.726855	0.752289	0.76416	0.683327	FLJ25163	C1orf190
2334646	2.93451	2.44284	1.90268	1.60083	HR54; hHR54; RAD54A; hRAD54	RAD54L
2334706	3.12739	2.45162	2.22627	2.02931	MGC22960; RP4-603I14.2	NSUN4
2334740	1.02212	1.10168	1.40793	1.44278	FAAH-1; MGC102823; MGC138146	FAAH
2334847	0.429943	0.437354	0.643918	0.558056	MBX; OTX3; PAXB	DMBX1
2334932	0.353202	0.539917	0.82974	0.674139	P-450HP	CYP4B1
2334986	2.35461	1.82288	2.48213	2.62198	MGC40051	CYP4X1
2335014	0.164622	0.223511	0.166424	0.102957	CYP4Z2P; FLJ40054
2335048	0.071347	0.100792	0.0124952	0.125402	LOC654164
2335132	3.13022	4.4961	2.40679	2.85116	UMPK; UMP-CMPK; RP11-511I2.1	CMPK
2335160	4.85979	4.47021	5.03686	4.04784	ASMD; FKHL12; FREAC8	FOXE3
2335172	0.567517	0.689783	1.16008	1.01921	FKHL17; FREAC9	FOXD2
2335671	0.14629	0.184129	0.242034	0.152339	HUD; PNEM	ELAVL4
2335922	5.64002	8.15466	7.98935	9.73729	p18; INK4C; p18-INK4C	CDKN2C
2335986	2.2318	2.19991	1.67063	1.92106	CGI-123; SID1669; MGC51169	RNF11
2336099	6.79907	6.09548	6.47574	6.31154	ORP9; FLJ12492; FLJ14629; FLJ14801; FLJ32055; FLJ34384; MGC15035	OSBPL9
2336271	12.2638	15.1385	12.745	12.3334	BTF3L4
2336302	1.94139	2.12071	1.66546	1.86773	LOC285359
2336375	0.223789	0.366239	0.219893	0.215146	PLA2G12	PLA2G12A
2336383	7.39793	6.77829	6.59005	6.57816	MGC3320; FLJ14936; RP5-965L7.1	PRPF38A
2336439	1.66996	1.89098	1.76482	1.412	GPX6; CL683; NPGPx; FLJ14777	GPX7
2336456	0.204528	0.257183	0.32372	0.119479
2336497	3.40149	3.10683	3.32684	2.92907	ZYG11; FLJ13456	ZYG11B
2336539	2.96022	2.51927	2.58061	2.42331	ZYG11	ZYG11A
2336585	1.90756	3.05103	1.31756	1.82593	NLTP; SCPX; NSL-TP; DKFZp686C12188; DKFZp686D11188	SCP2
2336650	0.207802	0.324641	0.425915	0.476863	PCAN; SLRR5A; MGC24995	PODN
2336706	1.3938	1.25665	2.06675	1.55187	CPT1; CPTASE	CPT2
2336809	1.15305	1.29524	1.02314	0.855139	DMRTB1	DMRTB1
2336891	0.475472	0.480376	0.433059	0.470139	5DI; TXDI1; MGC130050; MGC130051	DIO1
2336913	3.42279	3.39636	3.03016	3.87257	MGC8974; dJ167A19.4	LRRC42
2336963	2.1152	1.9643	1.7465	1.62509	FLJ32112; FLJ39169; RP4-758J24.3	C1orf83
2337003	14.1847	11.8738	13.225	11.3498	MRPL2; RPML2; MGC878; MRP-L2	MRPL37
2337147	0.363076	0.383655	0.378357	0.437867	HNRPA1P4	HNRPA1P4
2337217	0.511648	0.645889	0.881428	0.88268	MGC5097	TTC4
2337285	5.51997	5.11765	6.27897	6.024	MGC5097	TTC4
2337327	1.11702	0.879282	0.718522	0.681674	FLJ40201	C1orf177
2337369	1.45505	1.16583	1.38453	1.16745	TMEM61	TMEM61
2337392	0.309827	0.221943	0.270745	0.221211	BART; MGC119283; MGC119284; MGC119285	BSND
2337407	0.428376	0.545913	0.793867	0.472042	FH3; NARC1; NARC-1; HCHOLA3	PCSK9
2337524	0.406299	0.52923	0.477258	0.455806	FLJ45337
2337716	4.67095	4.30476	4.32349	4.0516	AMPK; AMPK2; PRKAA	PRKAA2
2337786	0.718953	0.795176	1.02993	1.17404	C8A	C8A
2338487	0.974288	1.3491	0.617949	0.96355	FLJ10986; RP11-242B9.1
2338625	1.0512	1.12858	0.704352	0.614722	HK1; MGC10642	HOOK1
2338719	1.39249	0.979249	1.2348	1.3612
2339109	0.191439	0.260537	0.280313	0.294289	MGC34796
2339139	1.60759	1.43145	1.25554	1.56785
2339328	1.37854	2.33674	1.44028	1.82595
2339334	0.179981	0.200076	0.0906393	0.0878139	ECAT11; FLJ10884; MGC133253; RP5-1155K23.3	L1TD1
2339414	2.9953	5.19489	2.6259	3.32613	UBP	USP1
2339454	0.13608	0.0789523	0.0510525	0.0670627	ANGPT5	ANGPTL3
2339511	2.9337	4.45634	2.43491	3.35693	APG4C; AUTL1; AUTL3; APG4-C; FLJ14867	ATG4C
2339658	2.79137	2.87025	3.43949	2.82393	HFH2; Genesis	FOXD3
2339682	1.45046	2.80411	1.22868	1.72152	ALG6	ALG6
2339740	1.36761	1.79789	1.17142	1.6631	DLEU2
2339786	5.08279	4.13359	6.33631	5.73165	PGM1	PGM1
2339872	1.82202	1.33279	1.53363	1.42051	NTRKR1; MGC99659; dJ537F10.1	ROR1
2339997	0.111767	0.0807238	0.185185	0.0981483	MGC35130; RP4-636O23.1	UBE2U
2340078	2.81298	2.09611	2.33662	2.25517
2340186	2.90614	2.8905	2.48392	2.34456	FLJ10770; KIAA1579; DKFZp762D1011	RAVER2
2340315	0.446186	0.460672	0.483588	0.530529	AK3; AK4	AK3L1
2340350	1.62204	1.33298	1.2328	0.917404	LOC645195
2340423	0.0562727	0.0638846	0.0536142	0.0885447
2340433	2.16298	1.80507	2.83266	2.76683	OBR; CD295	LEPR
2340529	0.215188	0.101773	0.0780024	0.0628762	DPDE4; PDEIVB; MGC126529; DKFZp686F2182	PDE4B
2340695	0.415376	0.545795	0.34947	0.284957	FLJ33378; FLJ43054; DKFZp761D221; DKFZp686A16142	SGIP1
2340819	0.360862	0.381678	0.547511	0.377307	FLJ33378; FLJ43054; DKFZp761D221; DKFZp686A16142	SGIP1
2340845	1.62087	1.54122	1.66215	1.77156	ER1; MI-ER1; hMI-ER1; KIAA1610; MGC131940; MGC150640; MGC150641; RP5-944N15.1; DKFZp781G0451	MIER1
2340930	0.0677662	0.134331	0.283073	0.137254
2340961	0.571491	0.778189	0.451126	0.489092	RP11-102M16.1	IL12RB2
2341083	5.69891	4.62217	7.52908	6.28157	DDIT1; GADD45	GADD45A
2341387	0.821903	0.643158	0.436607	0.549634	KIAA1365; MGC144918; DKFZp686I1147	LRRC7
2341535	0.499016	0.712519	0.796836	0.721269
2341565	12.0408	10.2752	12.2103	11.5099	p54; dJ677H15.2; DKFZp686M13204	SFRS11
2341645	1.64831	1.69419	1.925	2.12892	HHLA3	HHLA3
2341663	0.978919	1.04381	0.938714	1.10022	MGC9471	CTH
2342176	2.96726	3.15601	3.61339	3.21781	GFPP	FPGT
2342220	0.167953	0.143478	0.12446	0.131826	GFPP	FPGT
2342391	5.91882	7.67504	5.96461	6.09569	C1orf171; FLJ40918	TYW3
2342475	0.477149	0.602934	0.337158	0.507441	Lhx7	LHX8
2342576	6.87511	9.2495	5.75469	6.27142	MCAD; ACAD1; MCADH	ACADM
2342624	4.28842	9.07215	3.54542	6.71913	U45a; RNU45A	SNORD45A
2342665	0.119877	0.0505487	0.0309263	0.0824866	MSH4	MSH4
2342738	1.14995	1.20195	1.11229	1.17564	SIAT7C; PRO7177; ST6GALNACIII	ST6GALNAC3
2342904	0.762231	0.660157	0.992611	1.02196	SIAT7E; MGC3184; ST6GalNAcV	ST6GALNAC5
2343025	0.265879	0.345619	0.237224	0.500433	AK6; MGC33326	AK5
2343170	2.03532	1.70387	1.43273	1.52481
2343231	0.245001	0.279699	0.153724	0.203385	NELIN; MGC104234; MGC138865; MGC138866	NEXN
2343289	2.34234	3.96521	2.39329	3.52544	DjB4; HLJ1; DNAJW	DNAJB4
2343334	1.59622	2.14144	2.64967	2.19664	SEMCAP2; FLJ20075; SEMCAP-2	GIPC2
2343418	0.113842	0.133102	0.143332	0.16065	FP; MGC46203; MGC120498	PTGFR
2343473	0.133136	0.221724	0.142985	0.190299	GS3686; C1orf29	IFI44L
2343511	0.068081	0.251311	0.191716	0.304883	p44; MTAP44	IFI44
2343823	5.31092	5.38111	5.15151	5.07216
2344393	1.12271	1.53734	1.51483	1.53984	PKACB; MGC9320; MGC41879; DKFZp781I2452	PRKACB
2344450	0.0892367	0.12196	0.659231	0.0441846	Nedd-8; MGC104393; MGC125896; MGC125897	NEDD8
2344511	0.0849199	0.232418	0.174246	0.151446	DLAD	DNASE2B
2344542	8.4514	12.582	7.39387	10.3842	RPF1; FLJ12475; DKFZp761G0415; DKFZp761M0215; RP11-118B23.1	BXDC5
2344577	0.194233	0.0746958	0.163661	0.129518	SP-2; SPAP1	SPATA1
2344731	0.444842	0.614225	0.411486	0.422247	FLJ30067; NYD-SP29; RP11-507C22.2	WDR63
2344888	2.54185	1.55883	2.42919	1.7872	CCN1; GIG1; IGFBP10	CYR61
2344984	0.149644	0.286885	0.187823	0.200292	CaCC	CLCA2
2345023	0.205324	0.387481	0.232532	0.385341
2345061	0.184108	0.206581	0.0592542	0.121291	CaCC; CaCC2; MGC142247; MGC142249	CLCA4
2345095	0.153603	0.145457	0.118645	0.141057	CLCA3	CLCA3
2345128	1.08522	0.858116	1.13099	1.17099	Bif-1; CGI-61; KIAA0491; dJ612B15.2	SH3GLB1
2345196	1.6422	2.46975	1.31916	1.56048	FLJ11317; KIAA0448; MGC131986; dJ604K5.2	HS2ST1
2345239	0.255757	0.271202	0.371568	0.266495	FLJ11317; KIAA0448; MGC131986; dJ604K5.2	HS2ST1
2345286	3.57392	3.33558	3.10463	4.01179	LMO4	LMO4
2345617	5.81492	6.49679	5.10108	5.0427	PAK2; PRK2; Pak-2; PRKCL2; PRO2042; MGC71074; MGC150606	PKN2
2345816	0.297257	0.28849	0.346002	0.248908	DKFZp686G0786	GBP6
2345880	2.0436	1.68959	1.73607	1.66995	TA-LRRP; KIAA0231; MGC42220	LRRC8B
2345929	1.71772	1.41211	1.60625	1.6149	AD158; FAD158; MGC138551; DKFZp586J1119	LRRC8C
2346023	2.6041	2.18145	2.78434	2.27101	LRRC5; FLJ10470; FLJ20403	LRRC8D
2346074	3.29442	2.5348	2.78722	2.46085	ZAN75; Zfp326; FLJ20403; MGC61591; dJ871E2.1	ZNF326
2346399	3.487	3.47331	3.08386	2.93481	Hsk1; CDC7L1; HsCDC7; huCDC7; MGC117361; MGC126237; MGC126238	CDC7
2346575	0.258621	0.133977	0.0837635	0.13892	BRD6	BRDT
2346625	1.27401	1.43386	0.833233	1.38419	EPHXRP; FLJ90341	ABHD7
2346657	0.432418	0.304566	0.226023	0.256028
2346738	1.40645	2.17411	1.11288	1.683	FLJ13150; RP11-163M2.4	C1orf82
2346863	0.685916	0.854407	0.515093	0.733717	U21; RNU21	SNORD21
2346934	6.7614	6.65532	7.1747	6.49329
2347023	1.13645	1.77153	0.597086	0.926767	NY-SAR-41; dJ717I23.1; RP4-717I23.1	CCDC18
2347096	6.50122	5.78347	6.71812	5.68586	NC2; NC2-BETA	DR1
2347132	3.05142	2.59156	2.49692	2.73003	TOCA1; C1orf39	FNBP1L
2347502	2.0866	3.66104	1.93182	2.26931	ABC43; PMP70; PXMP1	ABCD3
2347625	0.49413	0.491857	0.31056	0.417536	CTL3; MGC45474	SLC44A3
2347732	0.996816	1.12239	1.34517	1.09435	FLJ31842; MGC102912	TMEM56
2347788	2.06193	3.2612	1.54443	2.80723	DKFZP566K023	RWDD3
2348060	3.21367	3.78828	2.79535	3.05511	PTB; MIBP; nPTB; PTBLP; brPTB; nPTB5; nPTB6; nPTB7; nPTB8; FLJ34897	PTBP2
2348437	3.0226	5.01381	2.51657	4.05226	MGC8717; DKFZP564F052	SNX7
2348514	1.77802	1.96487	1.81772	1.71298	LPPR4; PHP1; PRG1; PRG-1; KIAA0455; RP4-788L13.1
2348569	0.512174	0.39173	0.252456	0.223126	PALML; C1orf11; FLJ20271	PALMD
2348634	2.42863	2.41507	2.34474	2.39043	GDE	AGL
2348702	1.82171	2.64252	1.78522	1.90955	DKFZp781P1297	SLC35A3
2348757	7.92956	7.80074	10.9384	10.2854	DKFZP564L0864	HIAT1
2348792	2.68472	3.59903	1.85597	2.27785	FLJ10287; FLJ11219	CCDC76
2348854	6.27562	6.09408	7.0228	7.31224	FLJ44815
2348896	1.20726	0.897809	0.954093	0.908959	cdc14; hCDC14; Cdc14A1; Cdc14A2	CDC14A
2348962	0.169949	0.286247	0.535872	0.541018	STRG	GPR88
2348992	0.0793744	0.0698035	0.0690668	0.144734	CD106; MGC99561; INCAM-100; DKFZp779G2333	VCAM1
2349043	2.08323	1.66929	1.49709	1.40802	ZNT7; ZnT-7; ZnTL2; DKFZp686M0368	SLC30A7
2349086	0.435491	0.345839	0.373416	0.371565
2349129	0.513072	0.371197	0.500711	0.627408	ECGF1; EDG-1; S1PR1; CHEDG1; D1S3362	EDG1
2349211	0.0737649	0.0480573	0.0478791	0.121268
2349345	0.33438	0.708241	0.29713	0.342089	AMY2	AMY2B
2349402	0.2228	0.349889	0.441386	0.598727	LOC648749
2349848	1.11094	1.91325	0.932499	1.61454	HRMT1L6; FLJ10559	PRMT6
2349863	0.150818	0.117457	0.14668	0.144655	Lmnt1; KIAA0976	NTNG1
2350287	3.13795	3.3669	2.38532	2.96654	FLJ10330; MGC41809; MGC163218; RP11-293A10.1	PRPF38B
2350316	0.109685	0.0807137	0.139917	0.139466
2350339	1.81608	2.54013	1.21663	1.63039	PSP; MUNC18C; UNC-18C; MUNC18-3	STXBP3
2350391	0.0998186	0.132261	0.14105	0.184842
2350489	0.31452	0.31639	0.486847	0.288945	MGC150624; RP11-352P4.1	KIAA1324
2350551	12.3399	13.9812	11.6956	13.652	SERS; SERRS; FLJ36399	SARS
2350596	1.7884	1.15347	1.35103	1.37377	EGFL2; MEGF3; CDHF10; FLJ34118; FLJ42737; FLJ45143; FLJ45845; KIAA0279; Flamingo1	CELSR2
2350714	0.429993	0.31606	0.257177	0.275555
2350741	0.915358	0.502916	0.761202	0.715528	FLJ00381; MGC46534	ATXN7L2
2350787	0.459417	0.393459	0.440234	0.365109	FLJ00381; MGC46534	ATXN7L2
2350818	0.666352	0.894415	0.463404	0.769001	BALGR; GPCR3	GPR61
2350840	6.05332	9.79003	6.54933	7.74662	87U6; FLJ26559	GNAI3
2350880	2.89567	1.7069	2.90891	2.43589	AMPD2	AMPD2
2350922	0.364673	0.247946	0.263004	0.233649	GTM4; GSTM4-4; MGC9247; MGC131945	GSTM4
2350952	0.511887	0.53958	0.493775	0.626886	LOC642160
2350981	0.258008	0.200234	0.213358	0.172146	MU; H-B; GST1; GTH4; GTM1; MU-1; GSTM1-1; MGC26563; GSTM1a-1a; GSTM1b-1b	GSTM1
2351004	0.0599687	0.0497284	0.0107469	0.0410332	GTM5; GSTM5-5	GSTM5
2351063	0.598117	0.574182	0.918831	0.802426	MCSF; MGC31930	CSF1
2351121	6.17357	5.4177	5.99202	4.65847	DCAL; IRBIT; PRO0233; XPVKONA	AHCYL1
2351171	2.01058	1.56368	1.92336	1.57957	DCAL; IRBIT; PRO0233; XPVKONA	AHCYL1
2351233	0.266028	0.276869	0.269261	0.185672	FLJ25690	UBL4B
2351294	0.494552	0.5166	0.430983	0.53117	KV3.4; KSHIIIC; HKSHIIIC; MGC126818	KCNC4
2351393	4.86648	4.23986	5.45864	5.1378
2351465	0.532633	0.56307	0.561734	0.470964	PK1; PRK1; EGVEGF	PROK1
2351572	0.273853	0.267384	0.268711	0.345268	MOX44; TSPAN25	CD53
2351632	5.70787	9.33169	4.87735	6.25588	MGC45223; DKFZp313G0615	CEPT1
2351687	0.134736	0.150164	0.295537	0.21165	YKL39; YKL-39	CHI3L2
2351763	0.232865	0.159866	0.38949	0.216072	CHIT2; ECF-L; AMCase; TSA1902; RP5-1125M8.1; DKFZp313J1722	CHIA
2351787	0.21231	0.231044	0.177354	0.21341	FLJ23853; MGC126550; RP5-1125M8.4	C1orf88
2351817	1.20026	2.79774	0.824671	1.37573	PIG47; MGC24431	ATP5F1
2351854	0.570945	0.421259	0.441772	0.485041	MGC24133	C1orf162
2351872	4.25682	5.72094	3.7715	4.87704	RAP1; KREV1; KREV-1; SMGP21	RAP1A
2351940	5.93982	4.96155	5.9482	5.46676	DP103; GEMIN3; DKFZp434H052	DDX20
2352106	2.89247	2.82068	2.31305	2.68086
2352169	0.289208	0.214062	0.385817	0.195788	WNT13; XWNT2	WNT2B
2352228	10.501	10.7949	8.83588	9.28301	CAPZ; CAZ1; CAPPA1	CAPZA1
2352275	2.65871	2.47267	3.21744	2.95525	gb110; FLJ32791; KIAA1631; DKFZp667O1423	MOV10
2352338	0.424049	0.467993	0.476372	0.525717	TAFA3; TAFA-3; MGC138473; RP11-426L16.6	FAM19A3
2352501	1.39841	1.37643	1.61085	1.49888	KIAA0806; DKFZp451C181	LRIG2
2352609	1.49479	1.08712	1.46281	1.31402
2352743	1.90774	1.85117	1.69445	1.59203	SNM1B; FLJ12810; FLJ13998; DKFZp686C24187	DCLRE1B
2352758	2.91642	2.53329	2.09867	2.32867	Myak; Nbak2; KIAA0630; MGC26642; MGC33446; MGC33548	HIPK1
2352804	0.169902	0.302167	0.227972	0.171941	OLF44; HNOEL-iso	OLFML3
2353021	0.888533	0.815255	0.658685	0.411445	SCP1; MGC104417; HOM-TES-14	SYCP1
2353067	0.190021	0.13456	0.159341	0.117474	TSH-BETA	TSHB
2353237	1.65885	1.14231	1.79886	1.36303	LPP2; STB2; MGC5338	VANGL1
2353283	0.999822	1.45867	0.832209	1.16483	LPP2; STB2; MGC5338	VANGL1
2353337	0.42594	0.264901	0.370415	0.341016	FLIPT1; PRO34686; DKFZp761G0313	SLC22A15
2353396	0.140109	0.159799	0.322113	0.300834	FLJ38716; RP5-1185H19.1	C1orf161
2353477	15.095	14.8749	13.3319	11.4331	MGC3285; MGC51750	ATP1A1
2353669	0.0782005	0.131787	0.161916	0.12902
2353717	5.98651	5.00958	6.71242	5.9753	FPRP; CD315; EWI-F; CD9P-1; SMAP-6; FLJ11001; KIAA1436	PTGFRN
2353749	0.131341	0.0916265	0.114289	0.164211	V7; CD101	IGSF2
2353773	3.2871	3.19807	2.76231	2.84287	HuF2	TTF2
2353881	2.47742	2.38748	1.91709	2.30054	MAN1B	MAN1A2
2353988	0.894002	1.06089	0.736693	0.722283	FLJ20202	FAM46C
2354082	1.3916	2.30986	1.27406	1.4097	FLJ12796	WDR3
2354365	0.144625	0.191251	0.358679	0.376863
2354433	0.173215	0.235791	0.18435	0.25536	GIG16; HAOX2	HAO2
2354553	0.405251	0.573584	0.662829	0.521703	HSD3B; HSDB3	HSD3B1
2354634	13.2877	13.1873	16.6584	15.1153	PDG; PGD; PGAD; PGDH; SERA; 3PGDH; 3-PGDH; MGC3017	PHGDH
2355591	0.136181	0.149038	0.10556	0.132666
2355615	6.59054	6.43754	6.11691	5.9193	ERS-24; SEC22L1	SEC22B
2356100	0.242784	0.182895	0.396275	0.3732	JH; HJV; RGMC; HFE2A; MGC23953	HFE2
2356115	3.52872	3.98978	3.24756	3.44278	THIF; VDUP1; HHCPA78; EST01027	TXNIP
2356142	3.77217	3.10171	4.43076	4.24174	MGC46719; DKFZp762F237	LIX1L
2356181	2.43935	2.38292	1.8975	2.58465	Y14; RBM8; ZNRP; RBM8B; ZRNP1; BOV-1A; BOV-1B; BOV-1C; MDS014	RBM8A
2356205	2.47618	2.76968	2.70301	3.37757	FLJ25124; MGC126667; MGC126669	ANKRD35
2356218	0.219525	0.453812	0.656169	0.570311	ZMIZ5; FLJ14651	PIAS3
2356273	0.483324	0.750511	0.617363	0.610367	FLJ25124; MGC126667; MGC126669	ANKRD35
2356300	3.34383	2.72122	5.1352	3.84287	PRO827	ITGA10
2356344	2.66094	2.3912	2.25746	2.16769	BCA2; RNF115	ZNF364
2356425	0.125574	0.179322	0.339727	0.251918	LOC652793
2356658	0.165051	0.163225	0.0532163	0.135576	p62; IMP2; IMP-2; VICKZ2	IGF2BP2
2356721	4.05444	4.35408	3.94996	4.08356	ALC1; CHDL; FLJ22530	CHD1L
2356818	1.64873	1.40932	1.33452	1.8096	LGS; MGC131591	BCL9
2357193	0.0995652	0.0705834	0.0320655	0.0863585
2357845	0.0995413	0.0884945	0.116108	0.188954
2357961	2.98815	3.2816	3.13307	3.02926	CGI-143; MGC75015; RP11-196G18.18	BOLA1
2357996	3.10891	5.15342	2.44279	3.09295	H1; VSP45; VPS45A; VPS45B; VPS54A; VSP45A; H1VPS45	VPS45
2358044	1.22875	1.99202	1.16097	1.87571	H1; VSP45; VPS45A; VPS45B; VPS54A; VSP45A; H1VPS45	VPS45
2358092	0.312765	0.358706	0.334958	0.203947	CA14	CA14
2358117	0.726241	1.54451	0.697695	1.29329	FLJ23221	C1orf54
2358136	0.622784	0.558131	1.09779	0.820136	FLJ25889	C1orf51
2358153	7.27297	7.90981	6.0023	6.92798	MDS016; RPMS21; MRP-S21	MRPS21
2358171	6.10807	5.34724	4.60393	4.39441	HSPC099; FLJ32145	KIAA0460
2358221	3.23942	2.68205	2.79417	3.08376	HSPC099; FLJ32145	KIAA0460
2358320	2.35186	2.79624	1.78478	1.58318
2358360	0.843983	1.20963	1.0245	0.981178	ECM1	ECM1
2358393	0.428191	0.758495	0.730156	0.770756	TSRC1	ADAMTSL4
2358426	0.229697	0.306505	0.371561	0.343332	TSRC1	ADAMTSL4
2358520	3.86023	3.30276	2.9911	3.03862	ESET; KG1T; KIAA0067	SETDB1
2358591	0.563054	0.75989	0.506518	0.809388	ANX31	ANXA9
2358623	2.83214	1.92903	2.40326	1.82118	PP753; BNIP-S; BNIPL1; BNIPL2; BNIPL-1; BNIPL-2	BNIPL
2358646	1.37032	1.2039	1.60599	1.41954
2358671	1.36421	0.963514	0.699579	0.680511	FLJ20519; RP11-316M1.9	C1orf56
2358693	5.50737	6.12691	8.29633	9.10726	AF1Q; RP11-316M1.10	MLLT11
2358700	1.38267	1.17152	1.24839	1.42626	MGC29891; RP11-68I18.1
2358736	0.127687	0.149801	0.121548	0.161063	FLJ23467; RP11-68I18.4	TNFAIP8L2
2358743	5.8857	6.71035	5.49583	6.02741	MGC3180	SCNM1
2358761	2.20013	2.52234	1.48357	2.12137
2358821	0.39496	0.532655	0.546603	0.445718
2358855	1.76727	1.40918	1.56417	1.40879	KIAA1441; RP11-126K1.3; DKFZp781I1719	ZNF687
2358906	23.7218	22.8755	27.0976	24.6157	HN3; HsN3; PROS26	PSMB4
2358949	0.429016	0.354834	0.307794	0.280253	FLJ39281; KIAA1319; DKFZp779N1112	CGN
2358993	1.11595	0.700896	0.988215	0.66006	TUFT1	TUFT1
2359036	5.58594	4.15057	4.86282	4.16698	MY014; KIAA0488; MGC20471; MGC126871; MGC126873	SNX27
2359113	0.510703	0.638619	0.73678	0.557251	OAZ-t; TISP15	OAZ3
2359282	1.20201	1.51072	1.57046	1.51741	LEP18; SPRL5A	LCE5A
2359302	0.30621	0.443095	0.266331	0.297869	NICE-1; C1orf42	CRCT1
2359322	0.262766	0.219083	0.247903	0.217531	LEP15; SPRL3A	LCE3C
2359329	2.05083	2.53404	2.87114	3.28743	LEP14	LCE3B
2359352	0.261297	0.01	0.01	0.125901	LEP12; SPRL1A	LCE2D
2359360	0.0963865	0.0995522	0.127578	0.10662	LEP11	LCE2C
2359377	0.775535	0.766401	0.738067	0.788777	LEP9	LCE2A
2359386	0.01	0.0643224	0.01	0.0911954	LEP8; SPRL4A	LCE4A
2359431	0.342869	0.235394	0.174681	0.134499	LEP6	LCE1F
2359433	0.151629	0.248613	0.244475	0.171624	LEP5	LCE1E
2359439	0.49283	0.383901	0.507512	0.193891	LEP1	LCE1A
2359444	0.183735	0.249337	0.20358	0.232776	LEP2; SPRL2A	LCE1B
2359453	0.240798	0.207629	0.207852	0.201075	MCS; MCSP; MGC26305; MGC26519; HSMCSGEN1	SMCP
2359470	0.434188	0.280009	0.208041	0.290063	IVL	IVL
2359483	0.217684	0.351579	0.410837	0.318546	MGC138375; MGC138377	SPRR4
2359492	0.244784	0.23544	0.362042	0.317827	SPRK	SPRR1A
2359504	0.242033	0.233562	0.28873	0.283382	SPRR3	SPRR3
2359521	0.0275317	0.0437513	0.0229044	0.0159841	SPRR1; GADD33; CORNIFIN; MGC61901	SPRR1B
2359646	2.32574	2.66122	2.82655	2.72874	MGC111513	LOR
2359664	0.177969	0.207431	0.241187	0.31922	MIF; NIF; P14; CAGB; CFAG; CGLB; L1AG; LIAG; MRP14; 60B8AG; MAC387	S100A9
2359691	0.135475	0.0542246	0.108993	0.0723509	PSOR1; S100A7c	S100A7
2359736	8.05326	10.9061	9.21224	10.9825	pp7704; MGC86949; MGC131924; RP1-178F15.2; DKFZP547E1010	C1orf77
2359764	3.74037	5.65225	3.07789	4.36792	SNAPIN	SNAPAP
2359780	0.366097	0.445648	0.633105	0.525747	ANPa; NPRA; ANPRA; GUC2A; GUCY2A	NPR1
2359817	5.8059	4.59392	5.07658	4.44498	INT3; C1orf60; FLJ21919; FLJ44849; DKFZp686E1950; DKFZp781I1253; RP11-216N14.2; DKFZp686O20115	INTS3
2359885	0.868113	0.644611	0.710642	0.826681	FATP3; ACSVL3; VLCS-3; MGC4365	SLC27A3
2359993	0.982396	1.57022	0.849918	1.06192	JAL; hJAL; ATCE1; CREB3; CREB4; AIBZIP	CREB3L4
2360083	7.92489	5.75817	7.97642	7.26329	NICE-4; FLJ42300; KIAA0144	UBAP2L
2360158	5.96116	6.9266	4.4719	5.3921	HS1BP1; HCLSBP1	HAX1
2360186	0.388098	0.725143	0.393442	0.466473	LOC653690
2360206	2.80949	2.22887	2.61611	2.0515	ATPID; KIAA1137; DKFZp434M0219	ATP8B2
2360257	0.486013	0.32735	0.648232	0.507027	CD126; IL6RA; IL-6R-1; MGC104991; IL-6R-alpha	IL6R
2360310	0.0952552	0.15505	0.202445	0.283662	DKFZp434M202; RP11-61L14.3	TDRD10
2360346	0.817808	1.40315	0.978687	1.15838	EFNL3; nAChRB2	CHRNB2
2360468	1.46294	1.56893	0.932259	1.46418	FAD1; FADS; PP591; MGC31803; MGC40255; RP11-307C12.7	FLAD1
2360498	0.359918	0.398544	0.49817	0.440485	LEP503	LENEP
2360506	0.485559	0.505893	0.807651	0.60908	ZFP67; ZBTB15; c-Krox; hcKrox; DKFZp686G01254	ZBTB7B
2360541	0.401301	0.831453	1.04286	0.809874	FLJ32785; RP11-307C12.10	DCST1
2360576	2.40468	1.5678	3.05329	2.37206
2360633	2.27054	2.28159	2.2255	2.47696	EFL4; EPLG4; LERK4; MGC125826	EFNA4
2360647	0.773719	0.526315	0.826169	0.540407	EFL2; EPLG3; LERK3; Ehk1-L	EFNA3
2360677	0.646408	0.505714	0.275814	0.414419	SCP; slv; RP11-540D14.5	RAG1AP1
2360700	3.84749	4.67395	4.0182	4.17784	SCP; slv; RP11-540D14.5	RAG1AP1
2360728	0.59435	0.85994	1.4106	1.05471
2360773	4.58755	4.73692	4.2894	3.93749	MTX; MTXN	MTX1
2360818	0.525583	0.536224	0.649068	0.544946	KIAA1535	HCN3
2360850	4.46695	4.93371	4.70247	4.69897	FPS	FDPS
2360887	2.88019	2.02194	2.513	2.04983	NESCA; DKFZp761A1822	RUSC1
2360939	0.16663	0.26567	0.263396	0.30736	OCT3; OCT4; OTF3; OTF4; MGC22487	POU5F1
2360989	0.346682	0.456142	0.265291	0.19652	MST; LST005; FLJ10504; RP11-29H23.3; DKFZp686B1757; DKFZp686I01261	MSTO1
2361036	6.31722	7.70465	6.37743	7.72982	DAP-3; MRPS29; MRP-S29; bMRP-10; MGC126058; MGC126059; DKFZp686G12159	DAP3
2361154	2.00845	1.69859	2.22554	2.38054	SYT12; KIAA0080; MGC10881; MGC17226; DKFZp781D015	SYT11
2361196	0.362917	0.362216	0.272798	0.273083	GPR100; RLN3R2; GPCR142; MGC126556; MGC126558	RXFP4
2361241	7.65042	11.2651	7.28638	9.66461	MAPBPIP; HSPC003; RP11-336K24.9
2361257	0.223667	0.150308	0.20286	0.121238	CATX-8	RAB25
2361279	1.67391	1.8087	1.79222	2.12181	FPL; IDC; LFP; CDDC; EMD2; FPLD; HGPS; LDP1; LMN1; LMNC; PRO1; CDCD1; CMD1A; CMT2B1; LGMD1B	LMNA
2361342	0.812666	1.0082	1.60415	1.54404	RP35; SEMB; SEMAB; CORD10; FLJ12287; RP11-54H19.2	SEMA4A
2361384	1.48084	1.07651	1.15323	1.12012	FLJ90431; KIAA0446; RP11-54H19.3	SLC25A44
2361401	6.527	6.73752	7.87686	8.52152	BGLAP	PMF1
2361447	0.519231	0.602306	0.649895	0.529044	FLJ16057; FLJ32254; MGC13102	TMEM79
2361472	0.545279	0.679015	0.346438	0.232724	SSTK-IP; MGC26877; RP11-443G18.5	C1orf182
2361488	0.456857	0.622519	0.950344	0.612316	RHBG	RHBG
2361584	12.1871	11.7065	14.0919	12.5342	AIBP; MGC119143; MGC119144; MGC119145	APOA1BP
2361612	0.744166	1.09854	1.45633	1.37179	BRAL1	HAPLN2
2361635	0.625849	0.662712	0.889676	0.947776
2361697	2.12516	2.65426	1.68385	2.23526	CGI-41	C1orf66
2361731	5.92126	5.56089	7.28702	6.2758	TPRC; RCCP1; MGC4723; MGC17178	PRCC
2361761	0.534623	0.618886	0.929075	0.721776	MTC; TRK; TRK1; TRKA; p140-TrkA; DKFZp781I14186	NTRK1
2361839	0.535659	0.634101	1.07208	0.986742	FLJ32884; MGC45468; RP11-356J7.1	C1orf92
2362089	1.95181	1.43447	1.56163	1.62535	NEPH1; FLJ10845; MGC129542; MGC129543	KIRREL
2362157	0.466639	0.679003	0.394029	0.578253	R3; CD1A; MGC34622	CD1D
2362180	0.182898	0.173567	0.382982	0.232149	R4; T6; CD1; FCB6; HTA1	CD1A
2362201	0.262011	0.250052	0.149281	0.0743432	R7; CD1; CD1A	CD1C
2362230	0.134972	0.195676	0.291244	0.212569	R2; CD1A	CD1E
2362270	0.212802	0.233741	0.289848	0.172614	OR1-6	OR10K1
2362276	0.150038	0.241519	0.142029	0.14398	OR1-8; OR10R2Q	OR10R2
2362282	0.0974395	0.155938	0.120003	0.139873
2362323	0.143196	0.273541	0.314203	0.28325	OR1-21	OR6K6
2362333	0.0931854	0.0826192	0.060721	0.0553716	PYHIN3	MNDA
2362351	0.174424	0.227258	0.340715	0.403818	IFIX; MGC23885; RP11-520H16.1	PYHIN1
2362394	0.01	0.01	0.01	0.01	PYHIN2; IFNGIP1; MGC9466	IFI16
2362469	0.851854	0.995298	1.45267	1.13166	BIgR; NECL1; TSLL1; IGSF4B; Necl-1; synCAM3; FLJ10698	CADM3
2362511	0.321317	0.450737	0.524948	0.562385	FY; Dfy; GPD; CCBP1; CD234	DARC
2362537	0.220312	0.27614	0.0128387	0.120801	FCE1A; FcERI	FCER1A
2362591	0.0584073	0.0346316	0.0302845	0.03152	HGMP07J; HSHGMP07J; MGC138495; MGC138497	OR10J1
2362651	0.211725	0.315578	0.221509	0.171843	SAP; PTX2; MGC88159	APCS
2362702	4.96332	5.47091	5.5115	5.185	VHZ; MOSP; LDP-3; DUSP25; FLJ20442; RP11-190A12.1	DUSP23
2362723	0.851077	0.940764	1.2402	0.890316	FcRH6; FLJ16056	FCRL6
2362746	0.187057	0.268181	0.246668	0.208778	BLAME; SBBI42; FLJ20442; MGC129578	SLAMF8
2362860	0.345626	0.478016	0.513816	0.37264	GIRK3; KIR3.3	KCNJ9
2362892	0.295078	0.335783	0.57888	0.355113	FHM2; MHP2; MGC59864	ATP1A2
2362950	0.387734	0.534433	0.685538	0.532304	ATP1A1; ATP1AL2; MGC25056	ATP1A4
2362991	0.389325	0.490719	0.50972	0.603267	CASQ; PDIB1	CASQ1
2363042	5.47616	3.85239	7.45925	6.49088	PED; MAT1; HMAT1; MAT1H; PEA-15; HUMMAT1H	PEA15
2363074	0.0887074	0.525732	0.15932	0.364047	SUMO1P3	SUMO1P3
2363084	3.75667	2.79606	3.74825	3.5376	APH2; KIAA0253; RP11-517F10.1	NCSTN
2363128	0.414168	0.490318	0.586272	0.603526	LPP1; LTAP; STBM; KIAA1215; MGC119403; MGC119404	VANGL2
2363202	0.10514	0.223624	0.170531	0.197557	19A; CS1; CD319; CRACC	SLAMF7
2363248	0.128186	0.503828	0.256957	0.327265	hly9; mLY9; CD229; SLAMF3	LY9
2363372	2.16121	2.85844	1.43646	1.70737	KARCA1; MGC33338; RP11-544M22.9
2363389	4.00096	3.37271	3.84938	3.73755	MGC57670	NIT1
2363424	19.4505	23.2766	18.1322	21.2195	VP; PPO; V290M; MGC8485	PPOX
2363444	3.08549	2.22391	3.13155	2.98455	VP; PPO; V290M; MGC8485	PPOX
2363484	0.923082	0.843926	1.18488	1.18991	VP; PPO; V290M; MGC8485	PPOX
2363525	11.268	12.5983	9.92642	10.9774
2363562	0.0624633	0.0738767	0.124119	0.11209	FCER1G	FCER1G
2363579	1.64294	1.30565	1.34658	1.51641	TOMM40B; FLJ12770; RP11-297K8.10	TOMM40L
2363618	2.05107	2.11233	1.475	1.88468	CYBL; PGL3; QPS1; SDH3; CYB560	SDHC
2363679	0.473734	0.410405	0.417459	0.527982
2363689	0.291679	0.31473	0.217928	0.285816	CD32; FCG2; FcGR; CD32A; CDw32; FCGR2; IGFR2; FCGR2A1; MGC23887; MGC30032	FCGR2A
2363784	0.417998	0.402375	0.683537	0.495448	FCGR2B	HSPA6
2363808	0.240293	0.589762	0.312941	0.448598	CD32; FCG2; CD32B; FCGR2; IGFR2	FCGR2B
2363852	0.112034	0.0845526	0.0554311	0.118705	FCRL; FREB; FCRLX; FCRLb; FCRLd; FCRLe; FCRLM1; FCRLc1; FCRLc2; MGC4595; RP11-474I16.5	FCRLA
2363876	0.773903	0.581316	0.771035	0.530822	FcRY; FCRL2; FCRLY; FCRLM2; FREB-2; RP11-474I16.6	FCRLB
2363902	2.88238	5.27273	3.1895	4.6054	YVH1; DUSP1	DUSP12
2363919	8.1729	7.23836	6.35535	6.15467	ATF6	ATF6
2363992	0.235596	0.219035	0.163036	0.146219
2364016	1.0762	0.712608	0.699247	0.693762
2364155	5.77846	4.5785	5.65121	4.39354	KIS; Kist	UHMK1
2364189	3.05294	3.34262	2.63759	3.14133	AgX; AGX1; SPAG2	UAP1
2364231	0.378853	0.574918	0.523745	0.440422	TKT; MIG20a; NTRKR3; TYRO10	DDR2
2364381	0.367464	0.422217	0.285777	0.220058	RGP4; SCZD9; MGC2124; MGC60244	RGS4
2364438	1.68144	2.32897	1.55223	2.48143	CDCA1; NUF2R	NUF2
2364677	4.25307	3.86597	4.59307	4.41901	MGC126627; DKFZp686B09108	PBX1
2365086	0.189173	0.276168	0.208766	0.261997	FLJ25811	LRRC52
2365119	13.8136	20.7224	14.3057	18.5618	GST-III	MGST3
2365181	0.212621	0.191198	0.267363	0.201007	LOC440700
2365210	13.8879	12.3831	13.5931	11.6093	UK; UMPK; TSA903	UCK2
2365391	0.0548196	0.0788715	0.154643	0.0950045
2365496	3.5316	3.46389	3.48279	3.92242	BASS2; LST003; KIAA1513; KIAA15131	POGK
2365597	0.103344	0.229518	0.104292	0.109292	FLJ14904; RP11-102C16.1	MAEL
2365675	2.63967	2.27366	2.15635	2.26945	OCT1; OTF1	POU2F1
2365872	1.06718	1.42186	2.11537	1.6982	MK2S4; CAPZIP; MGC21854; MGC126585; MGC126611; RP3-503M14.1	RCSD1
2365933	0.231127	0.271377	0.266039	0.330375
2365958	2.04468	2.30035	1.99204	1.94785	PZR; PZRa; PZRb; PZR1b; FLJ21047	MPZL1
2366028	3.36067	5.58741	3.11358	4.77192	NRIP; ARCAP; PC326; MSTP055; RP4-745I14.1; 1200006M05Rik	IQWD1
2366132	4.95137	10.2297	4.04353	6.77885	MGC3794; dJ69E11.3; RP1-69E11.1	TIPRL
2366156	3.70616	3.54014	3.56512	3.3357	UNQ512; RP4-747L4.1; dJ747L4.C1.2	SFT2D2
2366184	0.311283	0.233467	0.209801	0.207035
2366287	0.103799	0.23917	0.117907	0.200122	LTN; ATAC; LPTN; SCM1; SCM-1; SCYC1; SCM-1a	XCL1
2366355	0.228264	0.159406	0.0850205	0.0913911	MGC4473
2366422	2.62512	2.96441	2.17183	2.22783	ATP1B; MGC1798	ATP1B1
2366490	2.55425	2.43966	1.90668	2.493	JEM1; JEM-1; JEM-1s; MGC22497; GOLGIN-45	BLZF1
2366581	3.12481	3.38905	2.18468	1.96821	FLJ10706; FLJ13470; MGC130018; MGC130019; RP1-97P20.1	C1orf112
2366753	1.32398	1.66538	1.0049	1.11964	NTKLBP1; FLJ11752; MGC51263; MGC70512; NTKL-BP1; RP11-545I10.1	SCYL1BP1
2366798	0.427419	0.392078	0.224823	0.28596
2366884	0.0502975	0.0158476	0.0524756	0.0444346	FLJ23550	C1orf129
2366941	0.304888	0.382356	0.508674	0.605324	FMOII; MGC34400; dJ127D3.1	FMO3
2367050	0.0609632	0.138327	0.112718	0.0696496	FMO1	FMO1
2367086	1.1852	1.55743	0.851305	0.979686	FMO2	FMO4
2367154	6.19151	5.18603	4.97457	4.79879	XTP2; BAT2-iso	BAT2D1
2367287	3.57952	4.4002	2.72744	3.24371	CGI-01; FLJ10310; 5630401D24Rik	KIAA0859
2367326	0.39578	0.391064	0.453254	0.487983
2367495	0.153123	0.0782761	0.0891198	0.0575905	RP1-106H8.1	C1orf105
2367537	2.92859	2.47625	2.9424	2.72009	CH1	C1orf9
2367599	0.0770321	0.213734	0.143691	0.219904	FASL; CD178; CD95L; TNFSF6; APT1LG1	FASLG
2367743	18.0992	21.2412	16.287	17.9439	PRX; p29; AOP2; 1-Cys; NSGPx; aiPLA2; KIAA0106; MGC46173	PRDX6
2367793	1.29383	1.42573	1.35518	1.52377	KHLHX; KLEIP; KLHLX; RP3-383J4.3	KLHL20
2367843	13.1546	10.493	12.3867	9.99514	FLJ10514; RP3-383J4.2	DARS2
2367892	0.968847	0.808485	0.516564	0.616556	MGC2629; D430004I08Rik	ZBTB37
2367963	2.99052	2.48702	2.67357	2.84018	HHL; TBC1D18; RP1-102G20.1; DKFZp686E1450	RABGAP1L
2368180	0.820151	0.824627	0.805166	0.817887	MGC111751	GPR52
2368198	6.61888	9.11462	5.89196	7.52109	SIP; GIG5; MGC87971; PNAS-107; S100A6BP; RP1-102G20.6	CACYBP
2368492	0.207831	0.287512	0.210703	0.313189	RPS29	RPS29
2368590	0.659098	0.800511	1.00041	1.11286	PAPPE; PLAC3; PAPP-A2	PAPPA2
2368840	0.655244	0.974707	1.10929	1.351	BRINP2; DBCCR1L2; FLJ41342; KIAA1747; RP5-1026E2.1	FAM5B
2369110	1.50559	1.36511	1.11124	1.42281	nGAP; MGC129919	RASAL2
2369252	0.11699	0.202601	0.227912	0.224376	FLJ40199; MGC26863; DKFZP564J047; RP5-990P15.1	C1orf49
2369325	0.315173	0.224593	0.190516	0.201091	FLJ35530; DKFZp564J047
2369339	4.25258	3.70653	4.73337	4.55767	FLJ10244; FLJ25604; KIAA0351; dJ595C2.1	RALGPS2
2369463	7.14271	6.05373	5.95663	6.01216	FAM20B	FAM20B
2369484	2.10988	2.20321	1.97233	1.93679	ADIR; ADIR2; FLJ22345; MGC111104	TOR3A
2369557	2.62496	2.70086	2.18322	2.17604	ACAT; SOAT; STAT; ACACT; ACAT1; RP11-215I23.2	SOAT1
2369609	0.236343	0.0859421	0.0494082	0.114488	ACAT; SOAT; STAT; ACACT; ACAT1; RP11-215I23.2	SOAT1
2369680	0.173716	0.457379	0.445505	0.404982	TUDOR3; FLJ34823; MGC163404; RP11-427G13.1	TDRD5
2369713	0.524833	0.421673	0.337268	0.334626	NDSP; MGC16664; RP11-12M5.2	C1orf76
2369796	4.18195	4.2	3.78077	3.40022	LAP1B; MGC3413; FLJ13142; DKFZP586G011; RP11-533E19.1	TOR1AIP1
2369843	1.58312	1.43845	1.18598	1.34334	gm133; CAP350; FLJ38282; FLJ44058; KIAA0480	CEP350
2369950	1.57767	1.10894	2.13948	1.45312	Q6; QSOX1	QSCN6
2370019	0.195068	0.344052	0.299149	0.217431
2370032	0.744157	0.609324	0.59014	0.444604	Gsh-4	LHX4
2370123	4.26037	3.21886	4.74357	4.50907	RP11-46A10.3	KIAA1614
2370317	1.35602	1.78223	1.2763	1.61435	HLALS	MR1
2370355	4.14921	3.86701	4.15403	3.86467	HLALS	MR1
2370433	0.716565	1.05991	0.981928	0.859977	BII; CACH6; Cav2.3; CACNL1A6	CACNA1E
2370804	0.0833465	0.106196	0.118199	0.0765623	DKFZp434E169	RGSL2
2370823	0.0901228	0.134367	0.202719	0.0774708	RGSL1	RGSL1
2370926	0.681973	0.748084	0.666616	0.915317	NPL1; c112; C1orf13; MGC61869; MGC149582	NPL
2370991	10.1492	10.3291	9.39915	8.20354
2371065	6.86726	5.2848	6.36074	5.84682	LAMB2; MGC87297	LAMC1
2371139	0.678376	0.716663	0.740539	0.526076	B2T; EBR2; BM600; EBR2A; LAMB2T; LAMNB2; MGC138491; MGC141938	LAMC2
2371255	3.30562	2.56466	2.85184	2.80179	EST1C; SMG-7; SGA56M; C1orf16; FLJ23717; KIAA0250	SMG7
2371346	1.02048	0.782157	0.837377	0.763913	RGL; KIAA0959	RGL1
2371474	2.03429	1.92501	2.14757	2.69696	sen15	C1orf19
2371547	1.45945	1.69922	1.59231	1.83205
2371694	2.17764	3.15147	1.77718	2.30672	BAP1; DING; BAP-1; HIPI3; RING2; RING1B	RNF2
2371738	0.704608	0.660739	0.598557	0.590804	FLJ20121; FLJ35944	C1orf26
2371873	0.222099	0.290602	0.229641	0.301544	ARMD1; AXPC1; FBLN6; FIBL6; FIBL-6	HMCN1
2372103	0.242364	0.159262	0.14209	0.0946782	MSF; SZP; CACP; HAPO; JCAP; FLJ32635; bG174L6.2	PRG4
2372141	1.50899	1.57691	1.13335	1.48522	TTG1; odr-4; FLJ20505	C1orf27
2372169	0.346724	0.283791	0.363993	0.294696	TISR	OCLM
2372211	0.59676	0.868552	0.333483	0.502494	PLA2G4; MGC126350; cPLA2-alpha	PLA2G4A
2372719	0.0617955	0.102375	0.0659237	0.0328626	RGS13	RGS18
2372781	0.221728	0.162865	0.152374	0.188742	1R20; BL34; IER1; IR20	RGS1
2372812	0.213483	0.153046	0.131362	0.131162	MGC17173	RGS13
2372858	0.976381	0.765074	0.922951	1.14749	G0S8	RGS2
2372924	4.72265	5.75886	4.53668	4.63195	SSA2	TROVE2
2372967	3.88125	3.88563	2.80252	3.29182	HRPT2; HPT-JT; C1orf28; FLJ23316	CDC73
2373336	0.0779406	0.198294	0.185343	0.175996	FH; HF; HF1; HF2; HUS; FHL1; ARMD4; ARMS1; CFHL3; MGC88246	CFH
2373406	0.16798	0.186724	0.110984	0.0934252	CFHL; FHR1; HFL1; HFL2; CFHL1; H36-1; H36-2; CFHL1P; CFHR1P; MGC104329	CFHR1
2373465	0.0426427	0.0353338	0.01	0.0359944	FHR4; CFHL4; FHR-4; RP4-608O15.2	CFHR4
2373494	0.0274547	0.0494603	0.0420354	0.0532362	FHR4; CFHL4; FHR-4; RP4-608O15.2	CFHR4
2373511	0.501397	0.447836	0.454304	0.41829	FHR4; CFHL4; FHR-4; RP4-608O15.2	CFHR4
2373564	0.162229	0.170009	0.185003	0.196596	LCA8; RP12	CRB1
2373693	1.90381	1.6896	2.12965	1.9879	LHX9	LHX9
2373736	2.59804	2.89548	3.12127	2.91604	NEK7	NEK7
2373842	0.433836	0.360492	0.33131	0.247624	LCA; LY5; B220; CD45; T200; GP180	PTPRC
2374126	0.383618	0.347976	0.200227	0.268346	B1F; CPF; FTF; B1F2; hB1F; LRH-1; FTZ-F1; hB1F-2; FTZ-F1beta	NR5A2
2374345	2.7241	2.49013	2.55679	3.02486	KIAA1078; MGC150680; MGC150681; RP11-93N17.1	CAMSAP1L1
2374414	1.02367	1.07675	1.12622	1.25093	GPR25	GPR25
2374422	0.649667	0.727687	0.917549	1.01859	LOC651728
2374544	0.472166	0.5339	0.833485	0.806439	DKFZp434B1231
2374604	0.653101	0.855268	0.608054	0.450328	B6P; MGC138829	PKP1
2374700	1.03937	1.4586	1.07923	1.3547
2374746	1.12769	0.70411	0.679023	0.548334
2374872	6.34493	6.21636	6.08505	5.73308	Imp9; FLJ10402; DKFZp761M1547	IPO9
2374926	0.651614	0.529189	0.67849	0.619771	C1orf40; MGC102893; MGC129812; MGC129813	TMEM58
2374956	6.6198	10.3798	5.62627	8.62153	TIM17; TIM17A	TIMM17A
2374982	8.2501	5.97839	9.70467	7.9934	DKFZP547H084	RNPEP
2375011	0.607735	0.625716	0.415091	0.356158	ERT; ESX; EPR-1; ESE-1	ELF3
2375038	0.485872	0.838723	0.973842	1.06442	ETBR-LP-2; ET(B)R-LP-2	GPR37L1
2375144	0.315755	0.377985	0.441315	0.323688	GPCR; FLJ14471; VTS20631	LGR6
2375212	1.08097	0.960496	0.864039	0.622197	MYPT2; MGC87886; MGC131980	PPP1R12B
2375338	0.0874245	0.0323069	0.0312428	0.0889209
2375500	1.1105	1.42923	1.28053	1.40025
2375596	0.771139	0.957968	1.45145	1.12636	RDC7	ADORA1
2375664	4.91783	3.57807	6.67755	5.82006	PC3; TIS21; MGC126063; MGC126064	BTG2
2375706	2.8737	2.61232	1.13034	1.13371	MXRA1; PMCA4; ATP2B2; DKFZp686M088; DKFZp686G08106	ATP2B4
2375784	0.165674	0.159052	0.1655	0.0748857
2375795	0.253074	0.200156	0.204656	0.234231	MXRA1; PMCA4; ATP2B2; DKFZp686M088; DKFZp686G08106	ATP2B4
2375810	5.20568	6.17097	4.19088	5.31099	KIAA0663; ZC3HDC11A; DKFZp781G2455; DKFZp686D03108; DKFZp686F14109	ZC3H11A
2375916	0.515999	0.308115	0.341761	0.268562	ICA12; Sox-13; MGC117216; SRY-box 13	SOX13
2376037	2.47199	2.14388	2.27276	2.54394
2376168	0.490799	0.279069	0.379686	0.223371	NF; NRCAML; FLJ46866; KIAA0756; DKFZp686P2250	NFASC
2376299	0.345658	0.663768	0.685256	0.547211	AXT; TAX; TAX1; TAG-1; FLJ42746; MGC157722; DKFZp781D102	CNTN2
2376376	0.570146	0.634789	0.735712	0.788513	HUCEP11; FLJ38497; KIAA0481	TMCC2
2376457	0.814875	0.485042	0.822773	0.488712	PCTAIRE; PCTAIRE3	PCTK3
2376548	0.486224	0.745967	0.696829	0.657575	UNQ3064; FLJ25004; FLJ34577; DKFZp761N1114	MFSD4
2376799	0.550351	0.663789	0.303204	0.303826	IKKE; IKKI; IKK-i; KIAA0151; MGC125294; MGC125295; MGC125297	IKBKE
2376849	2.19448	1.67413	2.16402	1.74961
2376894	0.885982	1.17821	0.643762	0.811485	RED; REDK; DYRK5	DYRK3
2376922	2.23541	1.89468	2.3466	2.2192	MAPKAPK2	MAPKAPK2
2376988	0.20493	0.262046	0.407641	0.374631	MDA1; NG.1; ZMDA1; IL-10C	IL19
2377020	0.398191	0.421463	0.283185	0.418715	IL-20; IL10D; ZCYTO10; MGC96907	IL20
2377035	0.775898	0.697404	0.369987	0.467042	C49A; FISP; MDA7; ST16; IL-24; IL10B; Mob-5; mda-7	IL24
2377094	0.964977	0.615614	0.679594	0.676763	MGC138308; MGC138310; DKFZp781D2217; PFK-2/FBPase-2	PFKFB2
2377141	0.498934	0.623147	0.562039	0.651523	C4BP	C4BPB
2377165	0.246161	0.177647	0.139119	0.0834584	PRP; C4BP	C4BPA
2377229	6.65505	6.24243	6.71502	6.45314	CR; TC; DAF	CD55
2377283	0.470497	0.332343	0.2348	0.22517	C3DR; CD21	CR2
2377332	0.270063	0.377019	0.699728	0.450225	KN; C3BR; CD35	CR1
2377427	4.43175	5.05055	3.80687	3.90807	KN; C3BR; CD35	CR1
2378019	0.423085	0.376206	0.406581	0.437835	VWS1; CLICKIII; dJ272L16.1	CAMK1G
2378068	0.47766	0.626101	0.363381	0.323247	RP1-28O10.2	G0S2
2378077	0.260756	0.353018	0.389935	0.414445	HDL; 11-DH; HSD11; HSD11B; HSD11L; MGC13539; 11-beta-HSD1	HSD11B1
2378121	0.424622	0.573471	0.810493	0.555327	T3JAM; FLJ44151; MGC117354; MGC163289; DJ434O14.3	TRAF3IP3
2378180	2.04933	2.00329	1.56923	1.64274	DEF; FLJ12704; FLJ41680; MGC29875; DJ434O14.5; DKFZp686E19106	C1orf107
2378256	0.309749	0.293959	0.315145	0.347376	CHR415SYT; sytdep
2378325	1.94177	2.00626	1.76171	1.75667	DJ667H12.2	SERTAD4
2378369	2.38715	1.58666	2.04628	1.96097
2378584	2.80624	2.44942	2.70476	2.88573	FLJ10876; FLJ16298; RP11-318L16.1	RCOR3
2378662	0.507818	0.503268	0.213326	0.273333	RNF84; MGC:39780	TRAF5
2378710	0.727	0.748447	0.519741	0.574012	ARC21; p21-Arc	ARPC3
2378937	6.81427	5.8645	6.90547	5.69228	CDT2; RAMP; DCAF2; L2DTL	DTL
2379009	1.77634	1.64074	1.4868	1.37456	B56A; PR61A; MGC131915	PPP2R5A
2379068	4.13525	4.45752	3.78468	4.22464	CIR2; SPUF; SCIRP10	NENF
2379132	0.98575	0.574379	0.81863	0.686755	ATF3	ATF3
2379168	0.340158	0.663821	0.608295	0.741195	FLJ32796; RP11-338C15.4	FAM71A
2379280	2.96273	2.51585	2.41706	2.52499	FLVCR; FLVCR1
2379314	0.6629	0.641371	0.672015	0.607884	FLJ12505; RP11-275G3.1	VASH2
2379399	0.960758	1.0336	0.676876	0.710165	RPK118; humS6PKh1	RPS6KC1
2379665	0.560391	0.567122	0.304283	0.40658	PROX1	PROX1
2379754	5.41802	7.24489	4.52636	5.18711	HSKM-B; ZMYND14; MGC119305	SMYD2
2379863	4.97057	5.71507	4.32521	4.75946	CENF; hcp-1; PRO1779	CENPF
2379974	1.23488	0.832496	1.47479	1.2186	TREK; TPKC1; TREK1; K2p2.1; TREK-1; hTREK-1c; hTREK-1e; MGC126742; MGC126744	KCNK2
2380055	4.20785	4.67655	4.01182	3.77016	MGC43935; NY-REN-45	KCTD3
2380440	0.702279	0.728209	0.461919	0.580888	IQCH; RP11-144C20.1	SPATA17
2380554	1.72514	3.33651	1.66699	2.47491	CGI-115	RRP15
2380590	0.27286	0.344071	0.359823	0.388603	MGC116892; TGF-beta2	TGFB2
2380785	1.08317	2.45536	0.886437	1.64707	KIAA1238	LYPLAL1
2380991	7.13281	8.68741	6.16256	5.8195
2381177	1.01426	1.09219	0.754392	0.743393	MARK; KIAA1477; MGC126512; MGC126513	MARK1
2381249	1.91755	2.31807	2.19572	2.44189	FLJ14146; RP11-322F10.4	C1orf115
2381264	0.782554	0.813752	1.09522	1.01163	FLJ20605; RP11-270A6.1	MOSC2
2381309	4.52328	4.90237	3.1802	3.8415	FLJ22390; RP11-295M18.1	MOSC1
2381368	0.994249	1.41425	1.33315	1.14127	HB24	HLX1
2381903	0.040518	0.100027	0.108196	0.109194	FLJ32421; MGC142195; MGC142197; RP11-452F19.1	C1orf58
2382043	0.386583	0.412913	0.451371	0.268863	FLJ35728; RP11-76K24.1	C1orf65
2382117	6.46243	5.8279	6.43321	6.109	mCANP; CANPL2; CANPml; FLJ39928	CAPN2
2382336	6.2935	5.28315	5.92369	5.32495	Fbx28; FLJ10766; KIAA0483	FBXO28
2382360	5.80751	8.77508	5.56417	7.84507	MLD; DEGS; DES1; Des-1; FADS7; MIG15; MGC5079	DEGS1
2382419	12.4428	17.3178	13.3434	16.3025	HSPC163	CNIH4
2382467	0.377561	0.678426	0.359807	0.6044	AR; ADR; ALDR1; MGC1804	AKR1B1
2382781	0.901402	1.02153	0.765176	0.840332	LOC127602; DKFZp781B1548
2382898	0.195715	0.162699	0.120611	0.126107
2382970	2.48692	2.22895	3.30957	3.48037
2383118	0.558097	0.816136	0.817452	0.724989	MIX; MIXL; MILD1; MGC138179	MIXL1
2383176	0.601975	0.587751	0.684875	1.08294	RP11-9C4.1; DKFZp761P211	C1orf95
2383312	2.65039	2.21948	2.43013	2.41165	AD4; PS2; AD3L; STM2	PSEN2
2383356	6.33124	4.18411	6.35016	4.68592	COQ8; ADCK3; MGC4849	CABC1
2383479	0.339492	0.359344	0.544551	0.437863	LOC503543
2383524	1.66018	1.62752	1.43963	1.52925	MGC42493	ZNF678
2383550	0.682375	1.01337	0.722854	0.753318
2383557	3.46656	3.95986	3.79934	4.30539	SVAP1; SNAP-47; FLJ12517; IMAGE3451454; DKFZp686M10160	C1orf142
2383606	0.421336	0.483465	0.629414	0.602225
2383639	0.319202	0.375996	0.455246	0.415719	MPN2; MGC163272
2383707	0.432443	0.374142	0.337473	0.45953	MGC119418; MGC119419; MGC119420	WNT3A
2383726	15.7463	18.3766	18.8925	19.257	ARF1	ARF1
2383733
2383734
2383740
2383742
2383746
2383747
2383748
2383750
2383751
2383754
2383755
2383756
2383758
2383759
2383761
2383762
2383763
2383764
2383765
2383766
2383767
2383768
2383769
2383771
2383773
2383775
2383777
2383779
2383781
2383783
2383785
2383787
2383789
2383791
2383793
2383795
2383797
2383799
2383801
2383803
2383805
2383807
2383809
2383811
2383813
2383815
2383817
2383819
2383821
2383823
2383825
2383827
2383829
2383859	9.30528	10.5126	10.7902	10.7071	GMK	GUK1
2383862
2383864
2383872
2383876
2383880
2383882
2383884
2383890
2383891
2383894
2383895
2383896
2383898
2383900
2383902
2383904
2383906
2383908
2383910
2383912
2383914
2383915	0.558783	0.689156	0.79063	0.76209	Cx47; CX46.6; PMLDAR; MGC105119	GJA12
2383999	1.39941	1.27518	1.42211	1.2561	UNC89; FLJ14124; KIAA1556; MGC120409; MGC120410; MGC120411; MGC120412; MGC138590; DKFZp666E245	OBSCN
2384268	3.4647	2.67233	2.62513	2.38818	HIST3H2BB	HIST3H2BB
2384375	0.356241	0.491014	0.48201	0.59145
2384401	5.37832	4.94812	6.80434	5.73838	ARHU; WRCH1; hG28K; CDC42L1; FLJ10616; DJ646B12.2; fJ646B12.2	RHOU
2384562	4.43774	7.69857	4.34442	6.09525	SPHAR; MGC88280; RP4-803J11.4
2384705	3.90028	3.9279	3.38313	3.82131	MGC138837; MGC138838	KIAA0133
2384788	3.87045	2.82311	3.87974	3.42961	GalNAc-T2	GALNT2
2384956	2.98161	4.3341	2.44628	3.1182	LDLC	COG2
2385012	0.554316	0.754244	0.843602	0.676331	GC36; nCL-4	CAPN9
2385095	10.7651	11.2126	9.83243	10.9691	ARV1	ARV1
2385146	0.531264	0.521526	1.02009	0.454559	TNL; FLJ44831	TRIM67
2385197	3.14187	3.28407	1.98531	3.46455	DAPAT; DAP-AT; DHAPAT	GNPAT
2385258	4.95937	4.10274	3.82843	3.49943	PRO4323; DDDL1880; dJ876B10.3; DKFZP547N043; RP5-876B10.3	C1orf124
2385306	6.17078	7.91316	5.86145	7.04379	TRAX	TSNAX
2385343	0.591615	0.460486	0.315899	0.383736	SCZD9; KIAA0457	DISC1
2385659	0.210928	0.20952	0.212373	0.187487	KIAA1383	KIAA1383
2385696	6.91902	9.21071	8.05662	9.16575	FLJ11383; MGC13186; RP4-659I19.2; RP4-678E16.2	C1orf57
2385797	2.48261	1.96518	1.99308	1.90553	KIAA1804; MLK4; dJ862P8.3; RP5-862P8.2
2385873	2.07749	2.24591	2.01383	2.48462	DPK; HOHO; TWIK1; K2p1.1; TWIK-1	KCNK1
2385967	0.579639	0.637497	1.02357	0.833454	FLJ37712	SLC35F3
2386397	3.89671	5.45131	3.25342	4.24262	GGPPS; GGPPS1	GGPS1
2386418	6.04143	8.56379	4.08428	5.85332	HRD; KCS; KCS1; pac2	TBCE
2386747	1.85376	2.26229	1.35474	1.45254	TM7SF1	GPR137B
2386828	0.985233	0.745526	1.0229	0.818941	EDARADD	EDARADD
2386867	0.244321	0.102272	0.123713	0.0864254	Gal-8; PCTA1; PCTA-1; Po66-CBP	LGALS8
2386943	0.441281	0.41927	0.422117	0.373343	ACTN2	ACTN2
2387006	6.85762	6.08392	6.68749	6.60095	FLJ45386	MTR
2387126	0.277547	0.166811	0.228926	0.296699	ARVC2; ARVD2; VTSIP	RYR2
2387606	0.942056	0.709813	0.894359	0.55766	HM3	CHRM3
2387711	0.912732	0.742022	0.797857	0.993034	FMN2	FMN2
2388085	0.10272	0.0576424	0.0964779	0.0526242	dJ317G22.1	KMO
2388148	0.143486	0.193198	0.259087	0.418067	FLJ32978	WDR64
2388219	10.67	8.75474	10.3185	8.82273	HEX1; hExoI	EXO1
2388525	1.18095	1.32263	0.581019	1.00014	CCCAP; HSPC085; NY-CO-8	SDCCAG8
2388794	0.833642	0.883462	0.466994	0.523527	RP58; TAZ-1; ZBTB18; C2H2-171	ZNF238
2388960	0.615511	0.430345	0.393756	0.466966	MGC33370; RP11-523K4.1	C1orf101
2389016	2.19036	1.6772	2.02377	1.91381	PNAS-4; CGI-146; FLJ21998	C1orf121
2389062	1.66355	3.35216	1.16985	2.79143
2389130	1.19286	1.78829	0.75329	1.28741
2389247	0.298008	0.266354	0.268468	0.362841	FLJ10157	KIF26B
2389718	0.505631	0.440195	0.415054	0.480683	FLJ32001; MGC18089; RP11-452J6.1	C1orf71
2389789	3.16017	3.28491	3.50673	3.76792	CGI-49; FLJ43187; RP11-439E19.2	SCCPDH
2389834	0.198411	0.196101	0.176408	0.174823	LOC149134; MGC120210; MGC120211; MGC120212; MGC120213
2389996	0.142488	0.154794	0.252083	0.171845	V1RL5	VN1R5
2390050	0.79706	1.0211	2.11843	1.52181	AII; AVP; FCU; MWS; FCAS; CIAS1; NALP3; C1orf7; CLR1.1; PYPAF1; AII/AVP; AGTAVPRL	NLRP3
2390089	0.424423	0.516323	0.379704	0.390406	OR2W5P; OST722	OR2W5
2390102	0.0991593	0.0635151	0.0314351	0.0419579
2390135	0.218883	0.311769	0.253916	0.28252	OR1-32	OR2G2
2390142	0.0789298	0.109271	0.0337519	0.0553508	OR1-33	OR2G3
2390158	0.0805607	0.180819	0.24676	0.127808	OR1-39	OR5AY1
2390162	0.576257	0.371663	0.289735	0.279755	UNQ9373	OR9H1P
2390180	0.386035	0.431343	0.405242	0.26235	OR2W3P; OR2W8P; OST718	OR2W3
2390243	0.125743	0.189128	0.313367	0.249136	OR2L14; MGC40047	OR2L13
2390253	0.18814	0.134768	0.188148	0.153316	OR2L2	OR2L3
2390259	0.161669	0.153114	0.181748	0.149725	OR1-47; OR2AK1P	OR2AK2
2390298	0.0807177	0.078114	0.0811807	0.0983071	OR1-48; OR2L12; OR2L4P; HTPCRH07; HSHTPCRH07	OR2L2
2390307	0.284928	0.325607	0.25609	0.287641	OR2L2	OR2L8
2390322	0.0739397	0.0633178	0.0422674	0.0980228	OR2M5P	OR2M5
2390335	0.0615105	0.0280761	0.0380438	0.0429775	OR2M6; OR1-54; OR2M3P; OST003	OR2M3
2390350	0.0312748	0.0465706	0.0489677	0.0427969	OR2M6; OR1-54; OR2M3P; OST003	OR2M3
2390355	0.120168	0.14561	0.226214	0.151107	OR1-55; OST710; TPCR100; HTPCRX18; HSHTPCRX18	OR2M4
2390489	1.09603	0.980111	1.25129	0.975572	FLJ22301	ZNF672
2390518	0.317302	0.393113	0.3174	0.467511
2390976	0.598512	0.552866	0.564322	0.585378
2391005	0.723287	0.503749	0.815209	0.821913	FLJ20584; FLJ21143; FLJ36119; RP11-465B22.4	C1orf159
2391150	0.403675	0.907463	0.876915	0.97688	AITR; GITR; GITR-D	TNFRSF18
2391172	0.92787	0.871355	0.792203	0.887366	OX40; ACT35; CD134; TXGP1L	TNFRSF4
2391188	1.81437	1.32757	2.22549	1.88452	Cab45; RP5-902P8.6	SDF4
2391255	3.63285	4.34342	3.03929	4.45203	NCUBE2; PRO2121	UBE2J2
2391302	1.25713	0.966259	1.15755	0.847507	KIAA1716	CENTB5
2391360	3.69492	4.01204	3.26437	3.5705	RC68; INT11; RC-68; INTS11; CPSF73L; FLJ13294; FLJ20542	CPSF3L
2391425	1.22238	0.647536	1.09657	0.695994	DVL; MGC54245	DVL1
2391465	1.95831	2.09481	2.83539	2.47752
2391532	3.31695	2.1714	2.86223	2.52845
2391647	7.57113	8.72139	5.89672	7.41611	HSPC182; FLJ13048; PNAS-120	SSU72
2391687	0.336229	0.278548	0.373486	0.418835	KIAA0447; MGC104754; MGC117254; MGC126715; MGC138494; DKFZp686M0869	SLC35E2
2391744	0.681754	0.379982	0.678733	0.423246
2391840	12.8968	14.1451	15.5161	13.1166	GNB1	GNB1
2392095	1.38851	1.71116	1.34925	1.74176	FLJ31031; MGC120153; RP11-181G12.3	C1orf86
2392161	0.520698	0.549052	0.852649	0.811053	FLJ14100
2392267	1.0863	1.21625	0.837744	1.11235	FLJ13941; RP4-740C4.1	MORN1
2392404	0.679268	0.565187	0.611791	0.595107
2392421	1.76782	1.4909	1.85743	1.83783	NALD; RNF69; MGC1998	PEX10
2392528	2.75525	3.52668	2.63167	3.03835	FLJ10782; DKFZp547M242	PANK4
2392584	1.49451	1.8827	2.20199	1.77706	TR2; ATAR; HVEA; HVEM; LIGHTR	TNFRSF14
2392666	0.621281	0.74011	1.14504	1.04251	LOC647718
2392945	0.732788	0.825967	1.09244	0.952519
2392985	1.42793	1.50712	1.26094	0.855555
2393538	3.08567	3.54542	2.63069	3.16129	FLJ20430; MGC99569	WDR8
2393654	1.73598	1.38364	1.42933	1.33436	KIAA0495; MGC138189
2393711	1.9149	1.48024	1.72014	1.45361	KIAA1185; RP1-286D6.3	LRRC47
2393740	2.24214	2.08552	1.73768	1.60619	GlyBP; RP1-286D6.4	KIAA0562
2393816	3.08266	3.30773	2.97546	3.00958	RP13-531C17.2	C1orf174
2394361	1.70189	1.30314	1.10737	1.03979	SLSN4; KIAA0673	NPHP4
2394478	0.528651	0.732168	1.1083	0.877691	KIAA0444; DKFZp434N231	CHD5
2394558	5.21868	7.49357	4.90558	7.29311
2394588	8.49952	6.2976	7.93405	6.61296	PCMT; PPMT; PCCMT; HSTE14; MST098; MSTP098; MGC39955	ICMT
2394608	0.817042	0.935811	1.33701	1.17808	PGR1; DKFZp762B2210	GPR153
2394626	2.44489	2.1803	3.20679	2.45328	ACT; ACH1; BACH; LACH; LACH1; hBACH; CTE-II; MGC1126; RP1-120G22.10	ACOT7
2394680	0.15914	0.135478	0.0762916	0.121796	HES2	HES2
2394699	1.35985	1.50106	2.04827	1.56358	KIAA0720; RP4-650H14.3	PLEKHG5
2394726	0.450917	0.668424	1.05911	0.962226	KIAA0720; RP4-650H14.3	PLEKHG5
2394784	3.39652	2.90838	2.67336	2.62021	FLJ23323; MGC131821; MGC138483	NOL9
2394817	0.869642	0.783536	0.771939	0.691815	KIAA0469; MGC99635	KLHL21
2394841	3.80757	3.81696	3.29823	3.0393	FLJ10737; dJ126A5.1; RP1-126A5.3	DNAJC11
2395123	0.0896166	0.0463692	0.0668092	0.0799759	UII; U-II; UCN2; PRO1068	UTS2
2395146	0.390224	0.416922	0.289753	0.420003	ILA; 4-1BB; CD137; CDw137; MGC2172	TNFRSF9
2395177	2.11308	1.4034	1.72413	1.41783	MIG6; RALT; MIG-6; GENE-33	ERRFI1
2395245	1.80571	1.21524	1.32226	1.26111	ARG; ARP; DNB1; ATN1L; FLJ38775; KIAA0458	RERE
2395418	0.235176	0.19109	0.168566	0.178818	DKFZp566H0824
2395490	35.2916	38.0192	35.5401	34.5982	NNE; PPH; MPB1; MBP-1; ENO1L1	ENO1
2395545	0.917306	1.12254	1.68531	1.28462	GLUT7	SLC2A7
2395564	0.455391	0.564972	0.64173	0.760707	GLUT5	SLC2A5
2395626	2.86633	3.30418	4.74634	4.7625
2395890	3.18802	2.4261	2.88294	2.73086	CSTN1; PIK3CD; FLJ32258; KIAA0911; XB31alpha; alcalpha1; alcalpha2	CLSTN1
2395965	1.34745	1.53073	1.58734	1.52538	ICAT; MGC15093	CTNNBIP1
2396009	3.76131	4.91635	2.88453	3.57522	MGC15436	LZIC
2396121	4.30525	4.03726	5.46409	4.55693	DFF1; ICAD; DFF-45	DFFA
2396201	0.373668	0.202147	0.237323	0.174825	SRG; cst; ZNF693; FLJ12223; FLJ20321; dJ734G22.1; RP4-734G22.2	CASZ1
2396362	0.368663	0.296872	0.264812	0.369764	FLJ37118; FLJ37833	C1orf127
2396415	0.0832286	0.146678	0.0746598	0.209759	sMAP; MAP19; MASP-2	MASP2
2396461	12.7811	9.74286	12.8477	10.7461	sMAP; MAP19; MASP-2	MASP2
2396480	11.5519	10.579	9.66177	9.04174	p2; p3; p4; RRP6; PMSCL; Rrp6p; PM-Scl; PMSCL2; PM/Scl-100	EXOSC10
2396537	4.77039	4.12645	4.07317	3.67063	FRAP; MTOR; FRAP2; RAFT1; RAPT1; FLJ44809	FRAP1
2396750	1.00353	1.14997	1.53061	1.36466	FBG1; FBX2; Fbs1; NFB42	FBXO2
2396781	7.03751	7.28654	7.09232	7.20663	REV7; MAD2B	MAD2L2
2396817	0.718116	0.665211	0.676956	0.451003	MTHFR	MTHFR
2396848	0.113533	0.184642	0.148242	0.0677077	ANF; ANP; PND; CDD-ANF	NPPA
2396858	0.849493	0.829393	0.733756	0.646073	BNP	NPPB
2397025	2.31127	2.40263	3.37126	2.78774	SDR1; RDH17; Rsdr1; retSDR1	DHRS3
2397600	0.350153	0.257494	0.27002	0.149888	FLJ23703; RP1-21O18.2	C1orf126
2397695	2.53074	2.06092	1.91919	1.79318	MCH6; APAF3; APAF-3; ICE-LAP6; CASPASE-9c	CASP9
2397732	1.29648	1.30826	1.49449	1.28265	FLJ23384	AGMAT
2397847	0.686036	0.495127	0.969123	0.95094	MIZ-1; ZNF151; pHZ-67	ZBTB17
2397898	0.0918658	0.302672	0.21745	0.40826	cvHSP; FLJ32733; DKFZp779D0968	HSPB7
2397926	0.604892	0.501974	0.638313	0.593498	FLJ36766; RP11-5P18.9	C1orf117
2397948	0.726171	0.466817	0.691199	0.519216	ECK	EPHA2
2397999	1.46011	1.24407	0.796214	0.903313	WGEF; FLJ33962; RP4-733M16.1	ARHGEF19
2398040	0.729537	0.529272	0.747371	0.585249	MGC10731; RP4-733M16.4	C1orf89
2398073	2.50413	1.92142	2.86595	2.30219	LOC645652
2398146	0.423433	0.608782	0.699432	0.532806	MGC27074; spergen2; spergen-2; RP11-430L17.3	SPATA21
2398193	0.28215	0.170522	0.135723	0.197541
2398369	1.71687	1.30054	1.07025	1.38547
2398706	5.16992	4.11355	5.64599	5.11302	MAGP; MAGP1; MAGP-1	MFAP2
2398736	2.7923	1.9107	2.7853	1.9528	MAGP; MAGP1; MAGP-1	MFAP2
2398789	11.5062	15.3648	10.8085	12.8667	IP; SDH; PGL4; SDH1; SDHIP	SDHB
2398820	0.79458	0.786452	1.13786	1.10244	PAD2; PDI2; PAD-H19; KIAA0994	PADI2
2398894	14.6304	11.3738	14.6702	12.0912	TD-60; KIAA1470; DKFZp762N0610	RCC2
2399289	0.359765	0.379487	0.640718	0.626858	TR2; T1R2; GPR71	TAS1R2
2399409	4.01362	3.37762	2.8482	2.97271	p600; RBAF600; FLJ41863; KIAA0462; KIAA1307; RP5-1126H10.1	ZUBR1
2399620	2.67705	2.63756	2.40314	2.3217	RP1-43E13.1	KIAA0090
2399687	0.0744153	0.187279	0.0694446	0.14549	AFAR3; AKR7A4
2399718	3.83067	3.55274	4.52437	3.75091	AFAR; AKR7; AFAR1; AFB1-AR1	AKR7A2
2399743	3.09018	3.40118	4.12248	4.0168	AFAR2	AKR7A3
2399765	12.7473	12.4983	11.8062	11.1532	LOC644075
2399908	0.480592	0.359827	0.331806	0.381758	RP5-1056L3.6; DKFZp686C23231	TMCO4
2399988	0.386677	0.471605	0.526373	0.41627	FLJ20225; RP11-91K11.1	RNF186
2400009	0.398774	0.479468	0.40986	0.336815	PLA2G2E	PLA2G2E
2400027	0.403393	0.458687	0.55701	0.441172	PLA2G2E	PLA2G2E
2400059	0.264952	0.225425	0.349794	0.281019	SPLASH; sPLA2S	PLA2G2D
2400177	1.82264	1.63068	1.66047	2.20453	PRO1489; MGC22256; ICAP-1alpha; RP11-401M16.1	CAMK2N1
2400193	2.03265	2.01125	1.86938	2.10668	FLJ12875; RP11-401M16.2	C1orf166
2400212	0.900362	0.810843	0.999746	0.944833
2400220	16.6574	19.2356	17.2975	18.4245	OST; WBP1; OST48; AGE-R1; MGC2191; KIAA0115; OK/SW-cl.45	DDOST
2400247	0.886762	0.736049	0.86286	0.505398	FLJ41242; FLJ41847; FLJ42879	SH2D5
2400322	8.3223	8.04658	8.82357	9.44447	HP1-BP74; MGC43701; RP5-930J4.3	HP1BP3
2400373	6.71415	5.93217	4.6785	5.02759	eIF4GII	EIF4G3
2400518	2.26841	1.4553	2.44093	1.95597	ECE	ECE1
2400655	0.279295	0.205282	0.375286	0.231826	RAP1GA1; KIAA0474; rap1GAPII	RAP1GAP
2400718	1.74128	1.54469	1.6194	1.77596	USP31; RAP1GA1; MGC14879; MGC132556; DKFZp762M1713	USP48
2400793	0.438278	0.32097	0.642201	0.682854	PLC; SJA; SJS; SJS1; PRCAN	HSPG2
2401018	0.6385	0.796149	1.2749	0.949597	WNT-4	WNT4
2401193	1.76768	1.46754	1.13468	1.17984	LUZP; FLJ35697; KIAA0601	LUZP1
2401251	0.409032	0.368416	0.428362	0.464142	HTRL; RDC4; HT1DA; 5-HT1D; HTR1DA	HTR1D
2401275	9.75516	12.8888	9.61827	9.69471	HNRNPR; hnRNP-R; FLJ25714	HNRPR
2401333	1.07413	0.865217	0.846765	0.874015	TFIIS; TFIIS.H	TCEA3
2401347	0.174509	0.325462	0.258238	0.287384	TFIIS; TFIIS.H	TCEA3
2401384	0.415196	0.396568	0.697561	0.513883	UPLC1; FLJ20199	DDEFL1
2401440	0.161283	0.259737	0.171463	0.210011	LOC146346; DKFZp686L08213
2401448	0.903223	0.43498	0.681125	0.432574	E2F-2	E2F2
2401493	8.88087	11.5999	9.58958	9.06484	HEIR-1	ID3
2401533	0.206208	0.24173	0.373734	0.236545	AD7C-NTP; AD7CNTP
2401581	2.26856	2.84967	2.76138	3.19	GALE	GALE
2401609	1.64166	2.35987	1.90384	2.15023	GALE	GALE
2401643	1.64247	2.1417	1.33406	1.97031	FUCA1	FUCA1
2401670	0.584063	0.752091	0.695904	0.573826	FLJ35961; MGC71483; RP11-293P20.1	MYOM3
2401753	0.144423	0.253659	0.256953	0.304981	IL22R; CRF2-9	IL22RA1
2401774	0.699964	0.467187	0.394268	0.364134	IFNLR; LICR2; IFNLR1; CRF2/12	IL28RA
2401849	1.11669	0.949307	0.771338	0.917444	FLJ33340	C1orf201
2401994	0.619247	0.527122	0.812457	0.523214	AML2; CBFA3; PEBP2aC; FLJ34510; MGC16070	RUNX3
2402068	2.52824	4.14628	2.15196	3.15146	P29; CBPIN; NTC31; DKFZp564O2082	SYF2
2402111	3.02961	5.05458	1.72272	3.37291	P29; CBPIN; NTC31; DKFZp564O2082	SYF2
2402416	0.778375	0.840888	0.467581	0.757477	MGC2603; FLJ14264	C1orf135
2402431	0.415238	0.276512	0.429386	0.429336	mSR; MPRA	PAQR7
2402447	0.715011	0.775564	0.552358	0.834467	FLJ32206; MGC138869; MGC138870	C1orf215
2402459	9.75128	13.4796	10.3713	13.5475	Lag; SMN; OP18; PP17; PP19; PR22; LAP18	STMN1
2402493	2.23264	1.64349	1.78314	1.47683	HSD-PLA2	PAFAH2
2402517	0.589593	0.600916	0.415728	0.439868	ZNT2; ZnT-2; PP12488; FLJ36708; MGC11303	SLC30A2
2402536	0.264352	0.443118	0.473183	0.412955	IRF; SMRZ; MURF1; MURF2; RNF28; FLJ32380	TRIM63
2402601	1.10568	0.867532	0.921464	0.952146	FLJ38020; FLJ38020; DKFZp434L1713
2402645	0.447372	0.770443	0.632358	0.688561	FLJ38020; FLJ38020; DKFZp434L1713
2402691	0.321557	0.473	0.690979	0.65845	MGC33414; RP11-569G9.6	ZNF683
2402838	1.09266	1.15889	0.963811	0.835099	GPATC3; FLJ12455; DKFZp686E0221	GPATCH3
2402861	1.22209	1.22472	0.986281	1.24196	GPATC3; FLJ12455; DKFZp686E0221	GPATCH3
2402883	0.201937	0.16621	0.224366	0.206255	SHP; SHP1	NR0B2
2402892	0.354939	0.385922	0.382753	0.61572	FLJ34633; RP11-344H11.3	C1orf172
2402914	1.70786	1.57939	2.12259	2.11188	MGC16491; MGC20845; RP11-344H11.8	FAM46B
2402942	0.813005	1.03053	0.795085	0.640557	APNH; NHE1; FLJ42224	SLC9A1
2403027	0.943411	0.58014	1.05898	0.847015	FCNH; HAKA1; MGC22543	FCN3
2403080	0.380109	0.39274	0.540252	0.489771	FCNH; HAKA1; MGC22543	FCN3
2403099	0.232299	0.521897	0.500773	0.522976	UNQ6122	CD164L2
2403111	3.14754	2.16145	3.23948	2.90613	SCAR2; WAVE2; dJ393P12.2	WASF2
2403158	0.633019	0.491894	0.635897	0.538309	CL23945; DJ159A19.3; RP1-159A19.1	AHDC1
2403215	0.655938	0.829669	0.998521	0.644655	SRC2; c-fgr; c-src2; FLJ43153; MGC75096; p55c-fgr; p58c-fgr	FGR
2403261	2.99319	3.13218	2.22781	2.1359	6-16; G1P3; FAM14C; IFI616; IFI-6-16	IFI6
2403301	8.33688	12.8739	7.95308	10.5147	REPA2; RPA32	RPA2
2403335	1.74256	1.64726	1.51614	1.24679	DKFZp686C132	EYA3
2403446	0.125806	0.180711	0.256288	0.163471	PAFR	PTAFR
2403470	4.68751	5.4439	3.73582	5.2447	SPF31; HSPC331	DNAJC8
2403557	5.12776	7.17451	4.06137	5.4239
2403585	2.22837	3.31404	1.62751	2.45995	TAF2J; TAFII20	TAF12
2403707	0.94893	1.13046	1.68204	1.65925	TTMB; MGC90489; MGC102864
2403740	10.5939	9.23142	10.0793	9.77481	SRP75	SFRS4
2403793	3.8713	3.44737	4.03935	3.53056	NRBF1; CGI-63; FASN2B	MECR
2404122	0.800178	1.2849	1.02527	1.05111	CMP; CRTM	MATN1
2404158	0.222571	0.331169	0.386818	0.25968	MGC125860; MGC125861	LAPTM5
2404209	1.03127	0.783869	1.62666	1.49839
2404254	5.30237	4.65888	5.292	4.93744	PUMH; HSPUM; PUMH1; PUML1; KIAA0099	PUM1
2404344	0.380057	0.264217	0.357348	0.399317	FLJ12650	FAM77C
2404377	6.63628	9.01609	6.78633	6.90764	40K; SPF38; PRP8BP; MGC1910; PRPF8BP; FLJ41108; RP11-490K7.3	WDR57
2404418	0.275453	0.42688	0.338463	0.282574	MDGI; FABP11; H-FABP; O-FABP	FABP3
2404521	6.01341	5.26574	6.77809	5.32327	PEF1A; PEFLIN	PEF1
2404546	0.89629	1.22101	1.48017	1.53945	BAI2	BAI2
2404693	0.887087	0.664385	1.3069	1.13099	BAI2	BAI2
2404766	0.410077	0.49091	0.591633	0.602104	FLJ25348; FLJ39908; RP11-84A19.1	SPOCD1
2404819	5.22932	7.25604	5.9668	5.80004	HH13; OV-1; PRL2; HH7-2; PRL-2; PTP4A; HU-PP-1; PTPCAAX2; ptp-IV1a; ptp-IV1b	PTP4A2
2404930	1.53445	1.47845	1.12668	1.70505	AASL548; PRO1105; FLJ90779; RP4-622L5; dJ622L5.7; RP4-622L5.3	C1orf91
2404958	1.19176	1.64558	1.71112	1.73584	LOC149194
2404999	15.9811	15.1703	17.9495	17.2357	F52; MLP; MRP; MLP1; MACMARCKS	MARCKSL1
2405036	5.00453	3.81756	4.87092	4.97159	FLJ10276; RP4-811H24.7; DKFZp686B09139	BSDC1
2405104	0.0789617	0.116282	0.034321	0.019547	ARCH; ARCH2; MGC62007	ZBTB8OS
2405152	0.190672	0.392754	0.25619	0.303145	SYNC; MGC149625; MGC149626; SYNCOILIN	SYNC1
2405192	11.4199	9.08893	10.7857	9.38462	YRS; YTS; TYRRS; CMTDIC	YARS
2405250	0.265332	0.242599	0.266332	0.236638
2405284	1.95579	1.63894	2.35996	1.86391	BCLP; CAC1; CAC-1; MGC10137	TMEM54
2405312	2.56108	1.7165	2.4583	2.17056	MT1; MTD	MT1E
2405364	6.28333	9.40756	5.53777	7.37726	ADK2	AK2
2405428	0.636187	0.535006	0.56202	0.591623	FLJ10759; FLJ16558	TRIM62
2405469	1.87719	1.67055	1.76448	1.73041	PH2; EDR2; HPH2; MGC163502	PHC2
2405576	0.181189	0.368529	0.365395	0.296128	KIAA1884; dJ947L8.1; dJ1007G16.1; dJ1007G16.2	CSMD2
2405893	3.79767	3.99869	3.5495	4.1372	FLJ90372; MGC138436	C1orf212
2405992	2.07253	2.22336	1.57101	1.58077	LOC653160
2406139	3.09554	2.25309	2.14141	2.23895	PP791; KIAA1837; PKD1-like; RP4-765A10.3	KIAA0319L
2406245	23.8826	23.5098	23.6988	20.8542	HC7-I; MGC104215; MGC126885	PSMB2
2406246
2406252
2406253
2406254
2406255
2406256
2406258
2406260
2406261
2406264
2406269
2406271
2406273
2406275
2406277
2406279
2406281
2406283
2406285
2406287
2406289
2406291
2406293
2406295
2406297
2406299
2406301
2406303
2406305
2406307
2406309
2406311
2406313
2406315
2406317
2406319
2406321
2406323
2406325
2406329
2406331
2406333
2406335
2406337
2406339
2406341
2406343
2406345
2406347
2406349
2406351
2406353
2406355
2406357
2406359
2406361
2406363
2406365
2406367
2406369
2406371
2406373
2406375
2406377
2406379
2406381
2406383
2406385
2406387
2406389
2406391
2406393
2406395
2406397
2406399
2406401
2406403
2406405
2406407
2406409
2406412	1.00449	1.16402	0.855723	1.17577	FLJ38984
2406420	1.18452	1.16949	0.704121	0.786337
2406579	4.44253	5.35294	6.19185	6.62039	FECD; PPCD; PPCD2; FLJ00201; MGC116970; MGC116972	COL8A2
2406597	8.77723	8.75694	8.84074	9.36929	BET3	TRAPPC3
2406662	1.30704	1.68505	1.3797	1.83602	FLJ10647; RP11-268J15.2	C1orf78
2406677	2.62092	2.06464	1.93373	1.70085	SHIK; SgK495; MGC4796; RP11-268J15.4	STK40
2406722	3.30673	3.45507	3.42481	3.38645	MST074; MSTP074; MGC15749	LSM10
2406735	1.00328	0.987985	0.835867	1.05862	NOR1; OSCP1; MGC26685	C1orf102
2406766	12.7007	12.695	12.0649	12.0648	DC37; RPMS15; MPR-S15; FLJ11564	MRPS15
2406783	0.659116	0.831409	1.08123	0.814099	CD114; GCSFR	CSF3R
2406926	0.63376	0.422895	0.679813	0.561293	EAA5; GLR7; GLUR7; GluR7a	GRIK3
2407128	3.53557	7.00955	3.39979	5.2411	Eaf6; FLJ11730; CDABP0189; NY-SAR-91; RP3-423B22.2	C1orf149
2407163	1.70548	2.71211	1.52662	2.16817	FLJ12553; dJ423B22.2; RP3-423B22.3	SNIP1
2407191	10.1622	11.3126	8.28514	8.66503	NGP1; Ngp-1; FLJ40906; HUMAUANTIG; dJ423B22.6	GNL2
2407224	0.309635	0.568814	0.849304	0.788386	FLJ40906; RP11-566C13.1	RSPO1
2407250	1.30958	1.82494	0.996967	1.16875	FLJ20508	C1orf109
2407314	0.711446	0.889943	0.903767	0.824785	FLJ16103; FLJ33655; MGC43817	EPHA10
2407359	0.802124	0.842043	0.810993	0.95609	FLJ16103; FLJ33655; MGC43817	EPHA10
2407439	6.86279	6.10146	5.24514	5.32905	PRP9; PRPF9; SAP61; SF3a60	SF3A3
2407478	1.31887	1.02568	1.23547	1.01392	SLIM2; MGC8696; MGC19547; MGC23614	FHL3
2407496	1.07766	1.67508	1.9678	2.86197	OCT6; OTF6; SCIP	POU3F1
2407729	1.56898	1.93504	1.5165	1.5551	GTR2; RAGC; FLJ13311	RRAGC
2407755	4.04394	4.5376	3.37032	3.67763	RRP2; MGC16997	RHBDL2
2407786	0.203225	0.24735	0.352519	0.345521	RRP2; MGC16997	RHBDL2
2407934	4.87243	5.17733	4.08935	3.92603	APP1; APP-1; PABP4; iPABP	PABPC4
2407985	0.683704	0.567738	1.11269	0.847041	HRT3; MGC12623	HEYL
2408028	0.347333	0.37418	0.588037	0.548175	CN-I; CN1A; CN-IA; MGC119199; MGC119201	NT5C1A
2408041	0.179928	0.29356	0.0922389	0.114548	CN-I; CN1A; CN-IA; MGC119199; MGC119201	NT5C1A
2408062	1.89809	1.43958	1.99755	1.42999	OP2; BMP8; MGC131757	BMP8B
2408111	3.20706	2.73282	2.44743	2.46444	IPT; MOD5; FLJ20061; MGC149242; MGC149243	TRIT1
2408146	0.457674	0.467279	0.56821	0.449023	LMYC; MYCL	MYCL1
2408189	17.6065	15.4776	14.6467	13.6939	PPT; CLN1; INCL	PPT1
2408244	0.487776	0.752994	0.385634	0.536797	MED; EDM2; DJ39G22.4	COL9A2
2408351	0.423448	0.299312	0.373395	0.435914	NIM3; RIM3; KIAA0237	RIMS3
2408437	0.418187	0.342572	0.599908	0.406457	CITED4	CITED4
2408477	0.352756	0.551827	0.534278	0.449695	FLJ23878; MGC43873	SLFNL1
2408499	4.41456	3.70437	3.99988	4.13584	Scml3	SCMH1
2408643	0.416311	0.563927	0.579095	0.511913	ET2	EDN2
2408681	0.512398	0.458187	0.288381	0.232353	KRC; KBP1; ZAS3; KBP-1; FLJ16752; KIAA1555	HIVEP3
2408832	0.465834	0.514401	0.511367	0.435148	GUCA2; STARA; GUANYLIN	GUCA2A
2408855	5.19107	4.30409	4.1957	3.87839	FOXJ3	FOXJ3
2408929	0.858255	0.670189	0.592141	0.404682	DKFZp434N2435	ZMYND12
2408955	0.157354	0.26159	0.244737	0.138825	FX; TB4X; PTMB4; TMSB4	TMSB4X
2408994	1.22008	1.4284	1.48813	1.2413	CLDN19	CLDN19
2409004	3.59396	2.48067	3.98913	3.40328	P3H1; GROS1; MGC117314	LEPRE1
2409069	2.59804	5.38848	2.14715	3.11006	EMAP115; E-MAP-115	MAP7
2409104	4.70824	3.4427	6.46464	4.20209	GLUT; GLUT1; MGC141895; MGC141896	SLC2A1
2409220	9.1049	9.76233	8.65375	8.6714
2409275	0.269318	0.239359	0.244683	0.290633	MGC52423	C1orf210
2409310	4.18445	3.57109	5.19599	3.78724	Ssc1; CGI-88	ELOVL1
2409344	4.55932	5.00547	3.56608	4.36865	ARC32; MGC17544; MGC19641	MED8
2409368	2.00721	2.86696	2.08326	2.77681	HT036; MGC20767; RP11-506B15.5	HYI
2409507	0.336917	0.295508	0.421464	0.470793	GLYT1; DKFZp547A1118	SLC6A9
2409613	7.00084	8.50997	6.8048	7.65391
2409770	1.04709	0.836804	1.08703	0.870238	U5F	RNU5F
2409820	0.190284	0.325073	0.300896	0.39105	VMD2L2; MGC126872	BEST4
2409847	0.809335	1.09729	1.605	1.319	PTCH2	PTCH2
2409904	5.87029	7.82077	5.32378	6.35743	EIF-2B; EIF2Bgamma	EIF2B3
2409970	1.35298	0.971537	1.00886	0.827497	FLJ21156; FLJ31983; MGC161630; RP11-69J16.1	HECTD3
2410111	1.93374	1.38937	1.80738	1.83739	MYH; MGC4416	MUTYH
2410158	0.824739	0.601222	0.526707	0.531505	TESK2	TESK2
2410241	24.9785	30.6083	24.4894	28.6309	PAG; PAGA; PAGB; MSP23; NKEFA; TDPX2	PRDX1
2410283	0.564717	0.737637	0.913379	1.19587	FLJ33084; RP4-697E16.4	CCDC17
2410330	4.10626	5.33882	2.74771	3.05816	SP192; RP11-767N6.1	GPBP1L1
2410470	2.17531	2.15169	2.303	3.01104	FLJ41892; p55-GAMMA; DKFZp686P05226	PIK3R3
2410522	2.83461	2.43756	3.3326	2.82616	MEB; GnTI.2; MGAT1.2; FLJ20277; DKFZp761B182	POMGNT1
2410574	8.5692	7.07187	9.89838	8.14732	PAR4	F2RL3
2411173	0.398736	0.572417	0.741642	0.504928	DD96; SPAP; MAP17; RP1-18D14.5	PDZK1IP1
2411198	0.43556	0.357121	0.209154	0.205239	SCL; TCL5; tal-1	TAL1
2411228	3.01351	2.97217	2.20191	2.20342	SIL; DKFZp686O09161	STIL
2411575	0.907536	0.795738	0.850779	0.930051	FKSG49
2411638	0.0564868	0.0648801	0.0614004	0.0776315
2411642	0.313154	0.370065	0.53285	0.343231	FLJ14442	AGBL4
2411799	0.19452	0.214903	0.196881	0.0831563	FLJ11588	C1orf165
2412082	2.59776	2.20786	1.68855	2.00147	hFAF1; CGI-03; HFAF1s; FLJ37524	FAF1
2412222	0.45267	0.433587	0.396189	0.322185	LOC51336
2412312	1.50228	1.26169	1.37649	1.27361	DEME-6; KIAA0452	C1orf34
2412360	7.00967	7.03797	7.26185	6.74015	AF1P; AF-1P; MLLT5	EPS15
2412529	2.99138	4.1548	2.30589	2.72686	hNRD1; hNRD2	NRD1
2412624	0.543817	0.366952	0.308046	0.255275	RAB3B	RAB3B
2412668	11.5271	11.207	10.6953	10.0066	AGR1; ERP18; ERP19; TLP19; hAG-1	TXNDC12
2412690	4.55936	3.51392	4.58414	4.22028	TOT4; SBBI81; MGC20419; RP11-91A18.3	KTI12
2412740	0.827167	0.5368	0.525194	0.576304	KIAA1836; RP11-155O18.2	CC2D1B
2412799	3.62978	2.11775	3.46147	2.83566	ORC1; PARC1; HSORC1	ORC1L
2412834	2.62091	2.64035	2.55518	2.71211	PAPD3	ZCCHC11
2412988	3.17014	3.25967	2.68931	2.80872	FLJ12439	C1orf163
2413008	0.17082	0.255411	0.308278	0.334502	RPS13	RPS13
2413032	3.37733	4.57279	3.26827	4.88343	FLJ10948	ECHDC2
2413115	0.285851	0.562478	0.5762	0.604729	AAAT; EAAT5; FLJ36602	SLC1A7
2413153	9.79247	10.5805	8.09792	9.85937	FLJ20580; RP5-1024G6.3	C1orf123
2413180	5.5346	9.33416	4.95406	8.42531	MAGOH	MAGOH
2413203	2.09659	1.46674	1.83572	1.72048	APOER2; HSZ75190	LRP8
2413316	0.351407	0.407036	0.772572	0.609624	FLJ40434
2413332	0.813405	0.854687	0.572647	0.761756	FLJ36155	GLIS1
2413423	5.62221	5.64003	4.55051	4.19521	NDC1; FLJ10407; FLJ12556; FLJ34120; RP4-654H19.1	TMEM48
2413484	2.59261	3.60393	2.02536	2.78487	FinGER1; DJ167A19.1	YIPF1
2413519	7.2173	12.7213	7.57047	10.0512	PP25; HSPCO34	C1orf41
2413578	10.3983	14.8323	10.473	14.5174	C1orf8; HSPC001; FLJ42977	TMEM59
2413633	1.0543	0.708504	0.952397	0.729939	CDCP2	CDCP2
2413685	1.12762	1.23842	0.813835	1.13843
2413846	0.65429	0.763926	0.869674	0.602736	MGC27169	C1orf179
2413879	3.13232	2.96115	2.99129	2.98912	MGC14416; MGC19467; DKFZp727A071	PARS2
2413886	0.0776147	0.160517	0.163321	0.220816	FLJ20619	TTC22
2413907	8.35831	5.30567	7.15457	5.89677	KIAA0018; SELADIN1; Nbla03646; seladin-1	DHCR24
2413943	2.94886	3.2873	2.51138	2.46638
2414366	2.98084	2.10874	2.76245	2.01166	LPP3; VCIP; Dri42; PAP-2b; PAP2-b; MGC15306; PAP2-beta	PPAP2B
2414440	0.124078	0.0749162	0.0928912	0.220884	FLJ43208; RP4-758N20.2	C1orf168
2414505	0.163572	0.33573	0.41403	0.368487	MGC163447	C8B
2414558	1.76215	2.16254	1.19754	1.54186	LOC645691
2414958	0.405931	0.455517	0.552933	0.351496	M1S1; EGP-1; GA733; TROP2; GA733-1	TACSTD2
2414998	2.37812	2.91398	2.12691	2.23748	KIAA1915; RP4-592A1.1; DKFZp779J1554; DKFZp779J1721	MYSM1
2415084	15.784	9.07103	13.9675	11.5884	AP1; c-Jun	JUN
2415266	0.97976	0.609945	0.555044	0.547613	CPJ2	CYP2J2
2415295	0.400387	0.395769	0.208941	0.329776	FLJ44073; MGC34837	C1orf87
2415728	3.67514	8.22411	3.76058	5.53576	BBP	TM2D1
2415837	0.67721	0.673117	0.978669	0.871889	FLJ10884; KIAA0172; dJ1078M7.1; RP5-1155K23.5	ANKRD38
2415910	2.35873	2.82884	2.23392	2.68544	ZIR2; KIAA1771	DOCK7
2416218	3.91432	7.27125	4.04451	5.32124	CENPR; NRIF3; TAP20; CENP-R; HSU37139	ITGB3BP
2416522	3.57375	3.18264	3.15177	2.90468	JAK1A; JAK1B	JAK1
2417008	0.0882556	0.0711478	0.0537557	0.0857398	PRO182; UNQ156; MGC126695; MGC126697	INSL5
2417016	0.459291	0.48148	0.439735	0.666671	FLJ23129; RP11-342H21.1	WDR78
2417095	2.48082	2.27434	2.06815	2.12194	UGTREL7; KIAA0260; MGC138236	SLC35D1
2417174	18.8743	26.0838	20.5014	20.3575	CGI-55; CHD3IP; HABP4L; PAIRBP1; FLJ90489; PAI-RBP1; DKFZp564M2423	SERBP1
2417272	4.20584	4.13937	4.44307	3.37882	FLJ31352; FLJ34695	GNG12
2417362	0.121558	0.192328	0.312053	0.275886	ARHI; NOEY2	DIRAS3
2417390	5.87041	10.8372	6.83936	10.0863
2417500	0.0776298	0.247613	0.199848	0.201626	LCA2; RP20; rd12; mRPE65; sRPE65	RPE65
2417528	4.68877	6.83024	4.06173	5.84996	DEP.8; SDP35; FLJ20354	DEPDC1
2417737	1.21642	2.58035	0.962278	1.13336	FLJ20331; dJ677H15.1; RP4-677H15.1	LRRC40
2417791	2.28221	2.68651	2.29364	2.07926	FLJ14998; dJ677H15.3; RP4-677H15.5; DKFZP566D1346	ANKRD13C
2417945	0.0893644	0.0763179	0.091525	0.124898	EP3; EP3e; EP3-I; EP3-II; EP3-IV; EP3-III; MGC27302; MGC141828; MGC141829	PTGER3
2418000	11.6611	12.1741	11.2277	11.0597	ZIS; ZIS1; ZIS2; ZNF265; FLJ41119; DKFZp686J1831; DKFZp686N09117	ZRANB2
2418078	0.143099	0.113632	0.107775	0.142543	Ntra; KILON; DMML2433; MGC46680	NEGR1
2418299	0.0661578	0.0446825	0.0377573	0.0233269
2418339	0.390127	0.45653	0.232768	0.297325	MGC22773	LRRC44
2418408	0.332058	0.368317	0.262147	0.207352	MGC90412; DKFZp547I048; RP11-653A5.1; DKFZp761G1720; DKFZp781L0319	C1orf173
2418451	2.94735	3.84754	3.24052	4.19039	FLJ41475; DKFZp779E0834	CRYZ
2418570	3.67334	3.73378	2.3282	2.98793	CTL5; FLJ34081; MGC34032	SLC44A5
2418700	0.143265	0.0974836	0.0816029	0.0562354	Asb-17	ASB17
2418929	2.63137	3.24814	1.6198	2.51502	GPI8; MGC22559	PIGK
2419046	3.99179	4.18256	3.71614	4.5652	VDU1; KIAA1097; MGC16868	USP33
2419113	3.28417	3.469	3.05465	3.23022	VDU1; KIAA1097; MGC16868	USP33
2419219	0.610251	0.413357	0.380035	0.644086	FLJ90637	C1orf118
2419235	9.52506	9.49934	6.34062	7.95447	FBP; FUBP	FUBP1
2419432	0.0745892	0.07378	0.0752997	0.0536418	ETL; KPG_003	ELTD1
2420229	0.780455	0.817266	0.655729	0.727821	FLJ23033; FLJ36855; RP5-836J3.2	TTLL7
2420427	3.9219	3.10861	3.79456	3.20639	GNG5	GNG5
2420467	0.820696	0.745126	0.761177	0.875244	CTB	CTBS
2420511	0.0282437	0.0768732	0.132737	0.042627	FLJ35487	C1orf180
2420521	1.24639	2.54748	0.957156	1.24832	ADIP; FLJ10848; KIAA0923; MGC75026	SSX2IP
2420615	1.22677	0.86258	0.731301	0.685224	GPCR; LPA3; Edg-7; LP-A3; LPAR3; HOFNH30; RP4-678I3	EDG7
2420642	1.08058	1.31217	0.672154	1.00358	TRPML2; TRP-ML2; FLJ36691	MCOLN2
2420681	1.17276	1.09016	0.732466	0.982916	TRPML3; TRP-ML3; FLJ11006; FLJ36629; MGC71509	MCOLN3
2420790	3.85545	5.42466	3.63721	5.03532	gm117; FLJ44982; RP11-234D19.1	C1orf52
2420808	1.25865	1.71479	0.964818	1.12249	CLAP; mE10; CIPER; c-E10; CARMEN	BCL10
2420832	4.44341	3.83943	4.35465	3.21539	DDAH; FLJ21264; FLJ25539	DDAH1
2420958	3.95692	5.11263	3.43961	4.49737	FLJ20729; FLJ20760; NY-BR-75; MGC131963	C1orf181
2421000	0.30711	0.486712	0.248885	0.374014	FLJ20729; FLJ20760; NY-BR-75; MGC131963	C1orf181
2421121	1.01053	1.27783	0.824886	0.916053	KIAA1229; MGC111060; dJ977L11.1; RP5-977L11.1	ODF2L
2421271	8.31159	11.0315	7.36412	9.8635	2007-09-15
2421753	5.21062	9.28873	4.59069	8.27005	TF2B; TFIIB	GTF2B
2421782	4.3288	7.81608	4.19355	6.65525	LOC645420
2421843	0.175604	0.210212	0.331354	0.258309	FLJ10961; DKFZp686E0974; DKFZp686L15228	GBP3
2421883	0.11211	0.207507	0.105738	0.123051
2421925	0.136925	0.233746	0.224427	0.347975
2421995	0.166103	0.0851272	0.0321413	0.0408859	Mpa2	GBP4
2422035	0.141371	0.088264	0.156287	0.0691453	GBP-5	GBP5
2422227	1.01249	1.36842	0.695783	1.05536	LOC492303
2422398	0.798116	0.805962	1.05069	0.710977	BARHL2	BARHL2
2422517	3.39436	6.56779	2.15051	3.65518	Zep-2; BM-005; KIAA1221; MGC60165; MGC70410	ZNF644
2422612	0.329324	0.761093	0.198118	0.421795	FLJ36760; MGC163397; RP11-539G11.1	SEC63D1
2422722	1.42582	1.27579	1.02083	0.894143	BGCAN; betaglycan	TGFBR3
2422885	1.42862	3.03534	1.32306	2.35103	LOC646821
2422967	0.695083	0.499363	0.492234	0.379996	ZNF163	GFI1
2423017	2.05947	1.98712	1.87868	1.97559
2423175	0.948149	0.900834	0.645733	0.711237	FLJ23493	FAM69A
2423264	7.61203	7.2908	8.06692	5.97725	CGI-100; RP5-976O13.2; DKFZp781B2248	TMED5
2423422	0.332101	0.282926	0.219846	0.41833	NSP2; SH2D3B; KIAA0554	BCAR3
2423597	3.22307	4.80587	2.60296	3.66202	ERBP; FCF2; TdIF2; HSU15552; LPTS-RP2; MGC163494; RP4-561L24.1	DNTTIP2
2423625	1.71477	2.14794	2.68327	2.53396	GLCLR	GCLM
2423669	0.226024	0.433927	0.455973	0.442426	FFM; RMP; ABCR; RP19; STGD; ABC10; ARMD2; CORD3; STGD1; DKFZp781N1972	ABCA4
2423829	2.11099	1.72627	1.24385	1.35861	PARG1; RP11-255E17.1	ARHGAP29
2423907	0.323596	0.292897	0.36542	0.420795	TF; TFA; CD142	F3
2424102	10.9058	10.4662	8.79243	9.41557	CNN3	CNN3
2424148	3.16244	5.04587	2.94105	4.3944
2424524	3.3847	3.2753	4.03203	3.8989	DHP; DPD; MGC70799; MGC132008	DPYD
2424740	0.132415	0.148815	0.197683	0.114755
2425118	3.10396	3.47818	2.14321	2.05663	SAS6; SAS-6; FLJ22097; MGC119440	SASS6
2425173	0.283459	0.299696	0.227894	0.389058	MGC14816; DKFZp313O1122	LRRC39
2425212	1.10256	1.31052	0.891879	0.838532	E2; E2B; BCATE2; MGC9061	DBT
2425400	2.07883	4.04615	2.26605	3.43874	EXTR2	EXTL2
2425447	5.62232	6.29392	4.86009	5.44596	AD-018; CGI-30; NPD015; HSPC143; MGC61450	DPH5
2425652	0.311257	0.33291	0.336637	0.467065	NOE3; NOELIN3; OPTIMEDIN; NOELIN3_V1; NOELIN3_V2; NOELIN3_V3; NOELIN3_V4; NOELIN3_V5; NOELIN3_V6	OLFM3
2425756	0.668567	1.03323	1.11284	1.10514	STL2; COLL6; CO11A1	COL11A1
2426385	0.332085	0.262632	0.133004	0.11278
2426559	2.02111	2.90647	1.70414	2.03081	MGC48637
2426614	0.172102	0.228813	0.232276	0.233716
2426676	0.162551	0.207429	0.189137	0.166896	FLJ30525; MGC111091; RP11-256E16.2	C1orf59
2426734	0.138641	0.100394	0.0683034	0.0648081	MGC26989; RP11-475E11.3	C1orf62
2426791	6.99619	5.55179	8.192	6.98678	MCLC; KIAA0761; RP11-475E11.6	CLCC1
2426840	1.20104	1.55247	0.696583	1.17025
2426951	3.60971	3.33282	2.83698	3.49039	DDA3; FP3214; MGC1780; RP11-297O4.2	PSRC1
2427007	2.94368	2.48609	1.80102	1.71706	NT3; Gp95	SORT1
2427074	8.15427	12.6243	7.3439	10.3936	PSC5; ZETA; MGC117302; MGC125802; MGC125803; MGC125804	PSMA5
2427117	0.495487	0.631468	0.743242	0.732264	AMIGO	AMIGO1
2427169	0.0930168	0.136474	0.047156	0.0991663	ACHM4; GNATC	GNAT2
2427208	5.45727	7.33486	4.59264	5.83369	EPS8R3; FLJ21522; MGC16817	EPS8L3
2427231	0.634429	0.672135	0.872522	0.542993	EPS8R3; FLJ21522; MGC16817	EPS8L3
2427342	0.363682	0.551211	0.564379	0.481873	MGC138212; MGC141988	ALX3
2427469	1.05156	1.27152	0.553166	0.745064	MCT4; MCT5	SLC16A4
2427500	8.26459	14.4726	9.38984	12.8216	XIP; MGC71071	HBXIP
2427538	0.15626	0.251296	0.183281	0.19642	Kcn1; Kv1.8	KCNA10
2427566	0.0685334	0.106509	0.188906	0.141704	HK4; MK2; HBK5; NGK1; RBK2; HUKIV; KV1.2; MGC50217	KCNA2
2427619	0.866876	0.729608	0.580125	0.567604	MK3; HGK5; HLK3; PCN3; HPCN3; KV1.3; HUKIII	KCNA3
2427688	0.989846	1.95136	0.564816	0.949438	RIF1; FLJ11269; RP11-96K19.1	C1orf103
2427720	3.77859	5.51665	3.19595	4.8645	PRO180; WWFQ154; MGC54289; RP5-1180E21.1	TMEM77
2427791	0.271348	0.424662	0.324579	0.587984	FLJ22457; RP5-1180E21.2	DENND2D
2427898	0.43426	0.418139	0.198771	0.469732	MEP50; MGC2722; HKMT1069; Nbla10071; RP11-552M11.3	WDR77
2427930	11.0662	9.68603	9.3588	8.85191	MEP50; MGC2722; HKMT1069; Nbla10071; RP11-552M11.3	WDR77
2427981	0.115311	0.222536	0.259962	0.193966	A3AR; AD026; bA552M11.5; RP11-552M11.7	ADORA3
2428079	0.515403	0.379257	0.376923	0.447646	FLJ31105	C1orf183
2428119	0.991814	0.884016	0.840485	0.708291	KV4.3; KCND3L; KCND3S; KSHIVB; MGC142035; MGC142037	KCND3
2428313	1.48668	1.63705	0.879753	1.24449	ST7R; STLR; FLJ11657; FLJ20284	ST7L
2428405	8.6061	9.02366	8.79697	9.49705	H9; ARH9; ARHC; RHOH9; MGC1448; MGC61427	RHOC
2428425	0.641527	0.532551	0.343386	0.729063	PP2CZ; PPP2CZ; FLJ35951; MGC19531; MGC90149; PP2Czeta; DKFZp434P1514; RP11-426L16.5	PPM1J
2428478	0.82856	0.770035	1.06272	0.920176
2428501	15.5175	18.4301	16.6814	15.0254	MCT; MCT1; FLJ36745; MGC44475	SLC16A1
2428699	1.24789	1.88197	1.34454	2.27932	PHTF	PHTF1
2428760	1.15635	1.16849	1.10453	1.12244	ROSBIN; RP11-324J2.1; DKFZp781E21150	RSBN1
2428796	0.223319	0.138415	0.260598	0.131456	LYP; PEP; Lyp1; Lyp2; PTPN8	PTPN22
2428855	1.57917	1.99442	1.16125	1.57139	BETA-4	AP4B1
2428932	0.412922	0.328745	0.43375	0.222504	SYT6	SYT6
2429069	3.21233	3.14476	3.1384	3.13114	PTC7; RFG7; TF1G; TIF1G; FLJ32925; TIFGAMMA; TIF1GAMMA	TRIM33
2429147	0.741766	0.915015	0.429177	0.580711	DAM1	BCAS2
2429235	0.033074	0.175095	0.123081	0.204973	MAD; MADA	AMPD1
2429261	9.26719	7.48662	9.56015	8.42487	UNR; D1S155E; FLJ26882; DKFZp779B0247; DKFZp779J1455; RP5-1000E10.3	CSDE1
2429277	13.8981	17.1939	12.5679	11.8455	UNR; D1S155E; FLJ26882; DKFZp779B0247; DKFZp779J1455; RP5-1000E10.3	CSDE1
2429338	3.24382	3.41197	3.75409	3.13716	UNR; D1S155E; FLJ26882; DKFZp779B0247; DKFZp779J1455; RP5-1000E10.3	CSDE1
2429371	1.74469	1.86186	2.76313	3.27341	TSN2; TSPAN-2; FLJ12082; RP4-666F24.2; 6330415F13Rik	TSPAN2
2429466	0.250701	0.339729	0.222994	0.318773
2429556	0.820771	0.941887	0.879187	0.694167	PDIB2; FLJ26321	CASQ2
2429613	1.0998	1.88204	1.43941	1.82204	HEN2; NSCL2	NHLH2
2429842	1.38044	1.6828	1.06167	1.14399	LOC148766
2429914	1.95653	1.52361	1.7299	1.52122	LOC653925
2430126	1.02008	0.891278	0.931963	0.958302	RNF99; FLJ13181	TRIM45
2430163	0.0179908	0.116631	0.1126	0.17384	B7X; B7H4; B7S1; B7-H4; B7h.5; VCTN1; PRO1291; FLJ22418; RP11-229A19.4	VTCN1
2430370	2.36327	2.34721	1.73228	1.84148	FLJ20142; dJ776P7.1	GDAP2
2430422	0.182898	0.101357	0.0678293	0.0480308	PF6; FLJ34497; FLJ44343; FLJ44353; RP4-776P7.2; DKFZp434B0610	SPAG17
2430762	1.37865	1.42281	1.1238	1.08913	TrpRS	WARS2
2430994	0.493742	0.483015	0.33272	0.479737	MGC45731	ZNF697
2431031	0.838755	1.19676	1.45149	1.48465	HMGCS2	HMGCS2
2431066	0.211822	0.228899	0.224222	0.248004	NBPF7	NBPF7
2431112	4.6183	3.83129	4.62362	4.57355	hN2; AGS2	NOTCH2
2431211	0.119997	0.0778199	0.0999144	0.0372355	svph4	ADAM30
2431877	0.126774	0.13607	0.130479	0.114534	LOC399761
2431886	1.77127	1.42009	1.06181	1.14465	LOC652526
2432571	2.57646	3.35144	2.46911	3.27308	MGC3200; FLJ34890; flj32422	POLR3GL
2432607	0.201278	0.338299	0.344877	0.350488	GnRH-II-R	GNRHR2
2432647	6.23114	5.61926	5.86267	5.43226	RPC3; RPC62	POLR3C
2432714	0.0672081	0.175021	0.0731651	0.119054	NK1; BY55; NK28; FLJ46513	CD160
2432851	0.816216	0.721279	0.718492	0.793569
2433209	1.9707	1.54014	1.84479	1.72594	MGC61468	PRKAB2
2433232	0.143653	0.135084	0.108605	0.0741569	FMO5	FMO5
2433371	3.3707	3.42809	2.4975	2.62262	LPAP; ACPL1; PACPL1	ACP6
2433432	0.460411	0.511772	0.295891	0.210219	CX40; MGC11185	GJA5
2433605	0.237422	0.209721	0.207686	0.244218
2434031	0.12137	0.167467	0.119389	0.0823165	HIST2H3D	HIST2H3D
2434124	0.661122	0.482676	0.622472	0.733964	H2B; GL105; H2B.1; H2B/q; H2BFQ; MGC129733; MGC129734	HIST2H2BE
2434129	25.2171	27.7846	23.5693	23.8331	HIST2H2BE	HIST2H2AB
2434139	1.71257	1.01484	1.09036	0.940671	SV2; KIAA0736	SV2A
2434159	2.75914	2.63905	3.14303	2.72217	SAP49; SF3b49; MGC10828	SF3B4
2434178	0.495077	0.307964	0.545573	0.379149	CRA; RP11-212K13.1	MTMR11
2434233	1.40663	1.02289	1.34733	1.25001	ZA20D1; CEZANNE	OTUD7B
2434319	3.52462	6.47171	3.93332	4.68465	LANPL; LANP-L; MGC5350	ANP32E
2434341	8.32467	5.71143	8.04635	6.52935	APH-1A; CGI-78; 6530402N02Rik	APH1A
2434438	7.20524	7.19224	5.22692	5.90013	TM; EAT; MCL1L; MCL1S; MGC1839; MGC104264	MCL1
2434490	2.04257	2.66733	1.81189	2.21374	MGC4319; MGC8394; MGC78563	ENSA
2434527	4.07871	4.25677	3.68219	3.55249	GPP34R; FLJ10687	GOLPH3L
2434546	0.168458	0.255259	0.291692	0.236586	NOHMA; DKFZP434A1315; RP11-363I22.1	HORMAD1
2434575	0.242769	0.379416	0.317736	0.331533	MGC3886	CTSS
2434609	0.323672	0.35865	0.25785	0.294271	CTSO; PKND; PYCD; CTS02; CTSO1; CTSO2; MGC23107	CTSK
2434633	2.36782	1.7848	1.59459	1.55208	HIF1B; TANGO; HIF1BETA; HIF-1beta	ARNT
2434716	12.2519	9.07826	12.7375	10.2822
2434746	0.884737	0.609331	0.581242	0.618058	FLJ11280; FLJ43504; RP11-316M1.5	FAM63A
2434776	1.04085	0.866398	0.859415	0.803165	SCIP1; SPEC1	CDC42SE1
2434805	1.32873	1.03212	1.41747	1.63011	SEMAY; m-Sema Y; m-Sema Y2	SEMA6C
2434862	1.7081	1.35569	1.63934	1.47863	SB145; MGC35223; RP11-68I18.5	LYSMD1
2434872	0.361018	0.296109	0.245862	0.212098	Sk-Tmod; DKFZp779I0852	TMOD4
2434892	11.2331	9.62158	10.0454	10.3843	YL1; Swc2; YL-1; TCFL1	VPS72
2434925	4.75907	4.23076	5.84018	4.78243	RFX5	RFX5
2434971	3.43815	3.77022	3.8097	2.97372	RFX5	RFX5
2435005	1.77018	1.13309	1.59099	1.57485	LPSB; SP56; hSBP; hSP56; FLJ13813	SELENBP1
2435044	4.46821	3.54837	3.80124	3.86911	SUHW5; ZNF635; KIAA0461; MGC71543	POGZ
2435149	1.07936	1.09781	1.00886	0.812686	CAGH4; CELF3; ERDA4; BRUNOL1; MGC57297	TNRC4
2435195	10.7814	8.38207	10.2239	9.00716
2435218	1.22088	1.38304	0.862914	0.77437	TDRD2	TDRKH
2435251	0.300844	0.344111	0.287127	0.263106	LRRN6D; DAAT9248; PRO34002	LINGO4
2435261	0.728008	0.890973	1.07784	0.753727	TOR; RORG; RZRG; NR1F3; MGC129539	RORC
2435323	0.198901	0.206922	0.260055	0.285756	FLJ37964; MGC126659; MGC138444	THEM5
2435347	1.44612	2.21011	1.12694	1.7078	CTMP; MGC29636	THEM4
2435383	21.7995	20.5086	22.1315	20.6366	42C; P11; p10; GP11; ANX2L; CAL1L; CLP11; Ca[1]; ANX2LG; MGC111133	S100A10
2435410	1.96031	4.74033	1.61015	2.8961	MLN70; S100C	S100A11
2435443	2.18501	2.50329	1.8454	1.59116
2435686	0.459416	0.400587	0.327248	0.288143	PDRC1; SEP53; C1orf10	CRNN
2435735	0.151099	0.198554	0.151375	0.209832	LEP16; SPRL6A; SPRL6B; MGC126833	LCE3D
2435745	0.350979	0.545636	0.453543	0.410129	LEP13	LCE3A
2435849	0.02267	0.042787	0.105032	0.102023	SPRR2D	SPRR2D
2435858	0.0898268	0.0777607	0.0431456	0.087538	SPRR2A	SPRR2A
2435878	0.277297	0.245496	0.241275	0.368406	SPRR2C	SPRR2C
2435949	0.316724	0.363091	0.419027	0.315322	PGRPIA; MGC149197; PGRP-Ialpha	PGLYRP3
2435961	0.155142	0.211792	0.321226	0.266548	PGRPIB; SBBI67; PGRP-Ibeta; PGLYRPIbeta	PGLYRP4
2435981	0.120728	0.179129	0.136891	0.197026	p6; CAGC; CGRP; MRP6; CAAF1; ENRAGE	S100A12
2435989	0.162159	0.175996	0.182067	0.175318	P8; MIF; NIF; CAGA; CFAG; CGLA; L1Ag; MRP8; CP-10; MA387; 60B8AG	S100A8
2436051	0.112228	0.127029	0.0390489	0.101878	NICE-2; S100A15; S100A7f; S100A7L1	S100A7A
2436067	0.348805	0.319259	0.215155	0.324939	2A9; PRA; 5B10; CABP; CACY	S100A6
2436132	20.3259	25.0108	20.9697	24.2866	NF45; MGC8391; PRO3063	ILF2
2436139
2436141
2436143
2436145
2436147
2436149
2436152
2436155
2436156
2436157
2436158
2436159
2436160
2436164
2436166
2436168
2436170
2436172
2436174
2436176
2436178
2436180
2436182
2436184
2436186
2436188
2436190
2436192
2436194
2436196
2436198
2436228	4.52259	3.56145	3.49953	3.74331	P66beta; FLJ37346; KIAA1150; MGC138257; MGC138285; RP11-216N14.6	GATAD2B
2436283	2.6133	1.48431	2.20488	1.93261
2436338	0.977026	0.714157	0.810964	0.642172	TORC2; RP11-422P24.6	CRTC2
2436378	6.7738	5.55909	6.44947	5.29501	ZIP1; ZIRTL	SLC39A1
2436401	11.1047	11.8969	12.4441	11.8779	PAR; hJT; HJTB; B PAR; HSPC222	JTB
2436403
2436404
2436405
2436407
2436408
2436409
2436410
2436411
2436412
2436415
2436416
2436417
2436418
2436446
2436448
2436450
2436452
2436454
2436456
2436458
2436460
2436467	0.096413	0.0405804	0.194314	0.059207	U3	RNU3
2436526	0.460828	0.375708	0.346113	0.419424
2436576	11.9439	10.949	11.2471	11.065	NICE-3; S863-3; HSPC012; MGC111001; DKFZp586G1722	C1orf43
2436716	5.85548	5.25029	5.1036	5.37992	GTAP; UBE2Q; NICE-5; PRO3094	UBE2Q1
2436754	7.5707	6.47135	6.61608	6.40195	DSH; G1P1; IFI4; p136; ADAR1; DRADA; DSRAD; IFI-4; K88dsRBP	ADAR
2436826	0.293395	0.1901	0.40762	0.16872	SK3; hSK3; SKCA3; KCa2.3	KCNN3
2436920	3.24728	5.0622	3.28803	4.60325	PMK; PMKA; PMKASE; HUMPMKI	PMVK
2436938	0.921111	0.895576	0.722403	1.03017	HPIP	PBXIP1
2436973	0.969975	0.721974	0.889404	0.74589	SHC; p66; SHCA; p52SHC; p66SHC; FLJ26504	SHC1
2436985	3.37997	2.49636	3.00286	2.67843
2437029	0.930021	0.733008	0.849877	0.710278	FLJ32934; RP11-307C12.4	DCST2
2437086	8.13259	11.3312	7.90899	9.29612	MGC34275; MGC125904; MGC125905	DPM3
2437094	4.32769	6.80713	5.04783	5.46921	KCP2	KRTCAP2
2437118	0.364445	0.444316	0.695137	0.625213	EMA; PEM; PUM; MAM6; PEMT; CD227; H23AG	MUC1
2437152	0.509365	0.522356	0.519276	0.680759	TSP3; MGC119564; MGC119565	THBS3
2437205	0.905971	0.669654	0.725535	0.588295	GBAP	GBAP
2437247	4.5054	2.93369	2.7269	1.96177	GCB; GBA1; GLUC	GBA
2437273	5.86634	3.51496	6.17069	4.13115	COTE1; cote 1	C1orf2
2437307	6.07354	6.08764	6.52624	6.13259	C1orf3	SCAMP3
2437329	3.7948	3.30114	3.61355	3.14291
2437363	0.457287	0.577923	0.621557	0.657599	PK1; PKL; RPK	PKLR
2437401	0.604854	0.566304	0.500507	0.302479	FLJ35976; RP11-21N7.3	C1orf104
2437412	0.175504	0.125382	0.0999181	0.142509	FLJ35976; RP11-21N7.3	C1orf104
2437417	1.88811	1.52893	1.48772	1.87074	ASH1; ASH1L1; FLJ10504; KIAA1420	ASH1L
2437554	0.166822	0.194745	0.0847667	0.15216
2437577	2.25752	2.02562	2.00252	1.91389
2437645	1.63618	1.64003	1.60698	1.60829	GON4; GON-4; FLJ12923; FLJ20203; FLJ23040; KIAA1606; MGC138817; MGC138818; DKFZp761I241; RP11-101O6.1; RP11-243J18.4	GON4L
2437736	2.02723	2.83797	2.00809	2.58593	RIT; RIBB; ROC1; MGC125864; MGC125865	RIT1
2437753	2.74315	2.97878	2.13662	2.36457	RP11-336K24.1	KIAA0907
2437801	1.92903	1.14469	1.59278	1.52077	GEF; P40; GEFH1; LFP40; GEF-H1; KIAA0651; DKFZp547L106; DKFZp547P1516	ARHGEF2
2437871	15.49	19.1882	17.71	19.5594	TLAP; HSD25; TRAPB; DKFZp686F19123	SSR2
2437893	1.56726	1.25228	1.2274	1.30278
2438016	1.87384	1.90004	2.34274	2.75274	FLJ22672	PAQR6
2438042	4.47881	3.17175	3.96498	3.43507	EST1B; SMG-5; LPTSRP1; FLJ34864; KIAA1089; LPTS-RP1; RP11-54H19.7	SMG5
2438093	4.50186	2.92315	5.42597	3.73021	NCU-G1; MGC31963; RP11-443G18.2	C1orf85
2438117	0.153979	0.196123	0.297253	0.246593	CCTG; PIG48; TRIC5; CCT-gamma; TCP-1-gamma	CCT3
2438125	18.2595	18.4764	16.2096	16.7168	CCTG; PIG48; TRIC5; CCT-gamma; TCP-1-gamma	CCT3
2438169	0.215865	0.345659	0.331102	0.30558
2438207	1.71965	1.35213	1.59417	1.53124	DKFZp686I1536	MEF2D
2438282	1.26104	1.1889	0.87218	1.20046	MGC1947; MGC10170; MGC10831	IQGAP3
2438344	4.83734	3.70195	4.19868	3.51163	GPATC4	GPATCH4
2438411	2.95649	2.54004	2.77505	2.66401	FLJ21841; Nbla00170	NES
2438458	2.81741	2.22248	3.3457	2.72417	RBP6; CRABP-II	CRABP2
2438482	2.74101	1.87631	1.96846	1.50689
2438504	9.08568	9.9011	7.71356	7.02519	MGC9831; MRP-L18; FLJ20917; MGC22737	MRPL24
2438531	6.5617	4.97412	8.1798	7.13504	HMG1L2; DKFZp686J1764	HDGF
2438575	0.54022	0.584784	0.915541	0.670422	TSAd; F2771	SH2D2A
2438612	0.350315	0.489243	0.645508	0.48779	IRR	INSRR
2438657	1.54816	1.43435	1.68729	1.52947	GTRAP48; KIAA0380; PDZ-RHOGEF; DKFZp667F1223	ARHGEF11
2438765	0.600495	0.729552	0.948147	1.16953	FLJ16478
2438792	1.77034	1.53659	1.51243	1.49972	PE1; METS; PE-1; bA110J1.4	ETV3
2438892	0.239079	0.45757	0.614253	0.558988	CD307; FCRH5; IRTA2; BXMAS1; PRO820; FLJ00333; FLJ00397; MGC119590; MGC119592; MGC119593; DKFZp667F216; DKFZp667E2019; RP11-217A12.1	FCRL5
2438938	0.709017	0.888802	1.21968	0.924291	LOC649203
2439001	0.52982	0.515964	0.3682	0.459835
2439052	0.146003	0.191126	0.310508	0.253665	FCRH1; IFGP1; IRTA5; RP11-367J7.7; DKFZp667O1421	FCRL1
2439101	0.266107	0.549516	0.45822	0.484919	FCRH2; IFGP4; IRTA4; SPAP1; SPAP1A; SPAP1B; SPAP1C	FCRL2
2439138	0.379588	0.656202	0.982778	0.887406	API6; PRO229; Spalpha; SP-ALPHA	CD5L
2439286	0.0371534	0.0395485	0.0500372	0.0304512	R1; CD1; CD1A; MGC125990; MGC125991	CD1B
2439303	0.0174637	0.0168217	0.0151833	0.0674446
2439308	0.0994964	0.173736	0.230075	0.194184	OR1-3	OR10T2
2439314	0.0418672	0.0725492	0.0408749	0.0270413	OR1-4	OR10K2
2439345	0.106987	0.154044	0.170459	0.175616	OR6Y2; OR1-11	OR6Y1
2439350	0.01	0.0899703	0.123407	0.120538	OR1-22	OR6N1
2439368	0.0253278	0.0783403	0.0261185	0.0214792	OR1-13; OR1-14; OR10X1P	OR10X1
2439373	0.220587	0.221227	0.215159	0.201819	EL2; SPTA	SPTA1
2439460	0.0767335	0.0381645	0.032989	0.0516127	OR1-17	OR6K2
2439478	0.0842301	0.110492	0.0286979	0.0966157	OR1-18	OR6K3
2439508	0.0907368	0.0701331	0.0416574	0.0391323	OR1-23	OR6N2
2439554	0.0345349	0.0226836	0.0540529	0.0825368	PYHIN4	AIM2
2439652	0.144642	0.183081	0.166824	0.152603	OR1-25; OR10J3P	OR10J3
2439662	0.0319014	0.0698936	0.114094	0.107033	OR1-28	OR10J5
2439714	0.159473	0.129903	0.334582	0.0557177	PTX1; MGC88244; MGC149895	CRP
2439801	0.655806	0.665525	0.783496	0.548778	NESG1; RP11-190A12.6	CCDC19
2439842	27.5686	26.2071	26.8861	24.1958	HA1756; KIAA0120	TAGLN2
2439861	2.82511	3.08033	4.50383	3.65642	Nrt1; IGSF9A; FP18798; KIAA1355	IGSF9
2439917	0.193553	0.356863	0.370471	0.332276	SF2001; CD2F-10; CD84-H1; PRO4421; MGC88194	SLAMF9
2439944	3.4987	3.359	2.79496	2.93859	MGC29896	PIGM
2439960	0.116469	0.134659	0.164694	0.21908	KIR1.2; KIR4.1; BIRK-10; KCNJ13-PEN	KCNJ10
2439975	1.04531	1.04041	1.26375	0.984526	EWI2; PGRL; CD316; CD81P3	IGSF8
2440018	2.30413	2.01991	1.94761	1.98586	H326; FLJ35857; MGC99640; MGC117276; MGC118891; DKFZp781G1096	WDR42A
2440117	4.66789	4.84105	4.24618	3.83123	HEP-COP; FLJ26320	COPA
2440143	8.04516	7.3906	8.17197	7.22602	PXF; HK33; PMP1; PMPI; PXMP1; D1S2223E	PEX19
2440258	0.145785	0.164772	0.264437	0.126447	KALI; NTBA; KALIb; Ly108; NTB-A; SF2000; MGC104953	SLAMF6
2440295	0.211234	0.341271	0.49036	0.376669	LY9B; hCD84; mCD84; SLAMF5; DKFZp781E2378	CD84
2440327	0.123341	0.161115	0.172466	0.188492	SLAM; CD150; CDw150	SLAMF1
2440354	0.729931	0.866506	0.747683	0.833647	BCM1; BLAST; hCD48; mCD48; BLAST1; SLAMF2; MEM-102	CD48
2440385	0.522272	0.555961	0.505771	0.386567	2B4; NAIL; Nmrk; NKR2B4; SLAMF4	CD244
2440413	0.134867	0.199628	0.119248	0.124174	HL1; LFR; HL-1; INTL; ITLN; hIntL; omentin; FLJ20022	ITLN1
2440440	0.14429	0.134699	0.316828	0.162818	HL2; HL-2	ITLN2
2440476	4.97257	3.65521	4.83722	4.55799	JAM; KAT; JAM1; JAMA; JCAM; CD321; JAM-1; JAM-A; PAM-1	F11R
2440523	2.87555	2.55487	3.59968	3.12088	UEF; FCHL; MLTF; FCHL1; MLTFI; HYPLIP1	USF1
2440549	0.332004	0.282247	0.459814	0.359925	FLJ00267; FLJ44128; RP11-544M22.6	ARHGAP30
2440586	0.213684	0.350169	0.296123	0.37036	LNIR; PRR4; nectin-4	PVRL4
2440612	9.34157	11.4807	8.99533	11.025	PFD2	PFDN2
2440625	4.63752	3.19061	4.19452	3.9038	DEFT; KE05; DEDD1; FLDED1; CASP8IP1	DEDD
2440664	4.86705	4.67095	5.9383	5.38397	beta4Gal-T3	B4GALT3
2440700	0.383481	0.5495	0.849592	0.727191	ADMP-1; ADAMTS-2; ADAMTS-4; KIAA0688	ADAMTS4
2440730	0.290653	0.280096	0.407835	0.408401	APOA2	APOA2
2440744	0.188667	0.235181	0.308153	0.190561	CAR; CAR1; MB67; MGC97144; MGC97209; MGC150433	NR1I3
2440784	0.570444	0.700893	0.915743	0.93657	P0; CHM; DSS; MPP; CMT1; CMT1B; CMT2I; CMT2J; CMT4E; CMTDI3; HMSNIB	MPZ
2440943	0.0603637	0.0826696	0.155695	0.0987049	CD16; FCG3; CD16a; FCGR3; IGFR3	FCGR3A
2441043	0.385775	0.269992	0.418439	0.398255	MGC51337; RP11-227F8.1	OLFML2B
2441188	0.20287	0.214433	0.310871	0.283452	HSD20; RP11-565P22.3	C1orf111
2441220	0.0830321	0.0737331	0.105478	0.181293	EAT2	SH2D1B
2441329	0.200176	0.193495	0.150517	0.122932	FLJ41579; MGC48998; RP11-331H2.2	C1orf110
2441386	0.299901	0.335772	0.169239	0.226061	MST092; MST106; MST129; MSTP032; MSTP092; MSTP106; MSTP129	RGS5
2441940	0.610891	0.611768	0.833727	0.74179	LMX1; LMX-1; LMX1.1; MGC87616	LMX1A
2442008	0.267158	0.229926	0.188665	0.133088	RXRC; NR2B3	RXRG
2442103	4.29812	4.30181	4.05563	4.01917	E3; ALDH4; ALDH7; ALDH9; TMABADH	ALDH9A1
2442134	10.2273	14.2591	10.1671	11.8436	PCIA3; TMCC4; HP10122; PNAS-136; RP11-466F5.7	TMCO1
2442397	6.39349	5.52914	5.95435	6.13761	STAF42; KIAA0764; RP1-9E21.4	TADA1L
2442424	0.806668	0.507562	0.67098	0.627112	dJ782G3.1; RP4-782G3.2	C1orf32
2442493	0.359631	0.820236	0.511694	0.604007	A33; MGC129986; MGC129987	GPA33
2442587	0.595021	0.802164	0.714547	0.52648	CD3H; CD3Q; CD3Z; TCRZ; CD3-ZETA	CD247
2442698	3.98206	3.70098	3.82618	3.76577	CREG	CREG1
2442800	0.128589	0.231679	0.222075	0.258456	SAC; HCA2; SACI; RP1-313L4.2
2442858	4.34961	5.70188	4.34998	5.14996	MGC125752; MGC125753; DKFZP564B167	BRP44
[truncated: 20,017 more rows]
